# Supplementary material for: Fluorescence Recognition of Anions Using a Heteroditopic Receptor: Homogenous and Two-Phase Sensing
Source: Int J Mol Sci. 2021 Dec 13;22(24):13396. doi: 10.3390/ijms222413396 (PMC8703701; doi:10.3390/ijms222413396)
Supplement: Supplementary file 1 [file ijms-22-13396-s001.zip › ijms-1502225-supplementary.pdf]

# Fluorescence recognition of anions using a heteroditopic receptor: homogenous and two-phase sensing

Marta Zaleskaya-Hernik<sup>1</sup>, Łukasz Dobrzycki<sup>1</sup>, Marcin Karbarz<sup>1</sup> and Jan Romański<sup>1</sup>

<sup>1</sup> Faculty of Chemistry, University of Warsaw, Pasteura 1, PL 02-093 Warsaw, Poland

\* Correspondence: E-mail: jarom@chem.uw.edu.pl

## Table of Contents

|                                                                      |     |
|----------------------------------------------------------------------|-----|
| 1. General information                                               | S1  |
| 2. NMR spectra                                                       | S2  |
| 3. Dilution studies                                                  | S8  |
| 4. UV-vis titration experiments                                      | S11 |
| 5. NMR Titration experiments                                         | S23 |
| 6. <sup>1</sup> H DOSY and 2D experiments                            | S27 |
| 7. Extraction experiments – mass spectrometry and <sup>1</sup> H NMR | S30 |
| 8. Extraction experiments - ion chromatography                       | S31 |
| 9. Emission spectra                                                  | S35 |
| 10. Crystal data                                                     | S46 |
| 11. References                                                       | S52 |

## General information

Unless specifically indicated, all other chemicals and reagents used in this study were purchased from commercial sources and used as received. If necessary purification of products was performed using column chromatography on silica gel (Merck Kieselgel 60, 230-400 mesh) with mixtures of chloroform/methanol. Thin-layer chromatography (TLC) was performed on silica gel plates (Merck Kieselgel 60 F254).

<sup>1</sup>H and <sup>13</sup>C NMR spectra used in the characterization of products were recorded on Bruker 300 spectrometer using a residual protonated solvent as internal standard. DOSY experiments were conducted at 298 K on Varian VNMRs 600 MHz instruments with a residual solvent signal as an internal standard.

Mass spectra were measured on Quattro LC Micromass or Shimadzu LCMS-IT-TOF unit.

UV-vis analyses were performed using Thermo Spectronic Unicam UV500 Spectrophotometer.

Fluorescence emission spectra were measured on a Hitachi F-7100 Fluorescence Spectrophotometer at 298K.

High-performance ion chromatography (HPIC) analyses were performed using a 930 Compact apparatus.

### NMR spectra

$^1\text{H}$  and  $^{13}\text{C}$  NMR spectra were recorded on a Bruker 300 MHz spectrometer.  $^1\text{H}$  NMR chemical shifts  $\delta$  are reported in ppm referenced to residual solvent signal (DMSO- $d_6$ ).

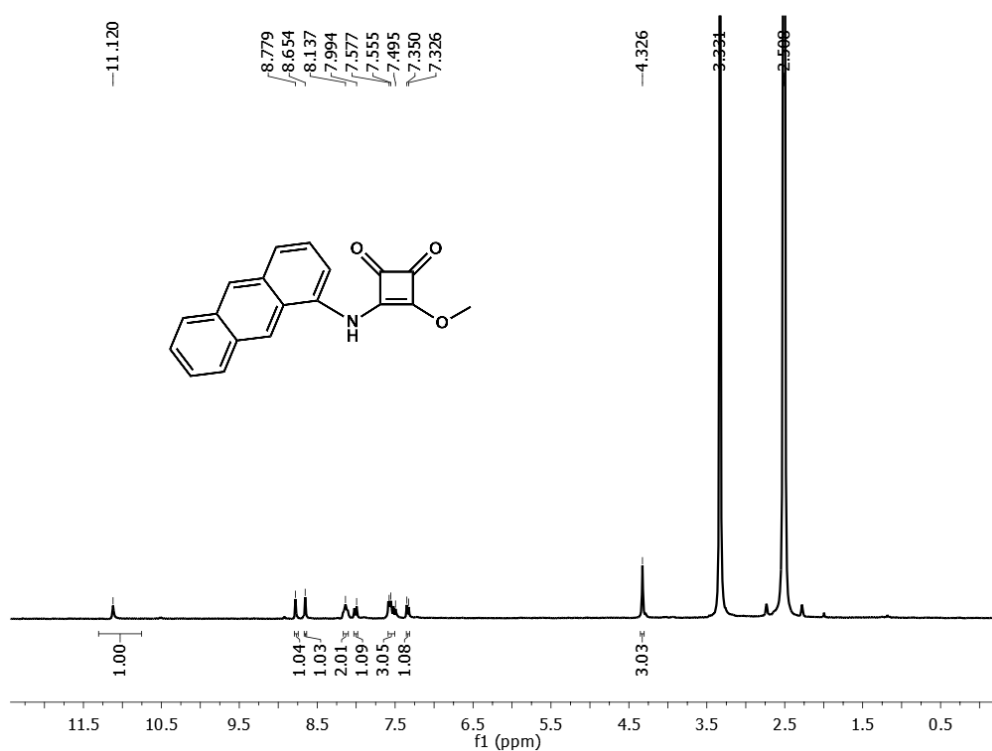

**Fig. S1.**  $^1\text{H}$  NMR spectrum of compound **M1** in DMSO- $d_6$ .

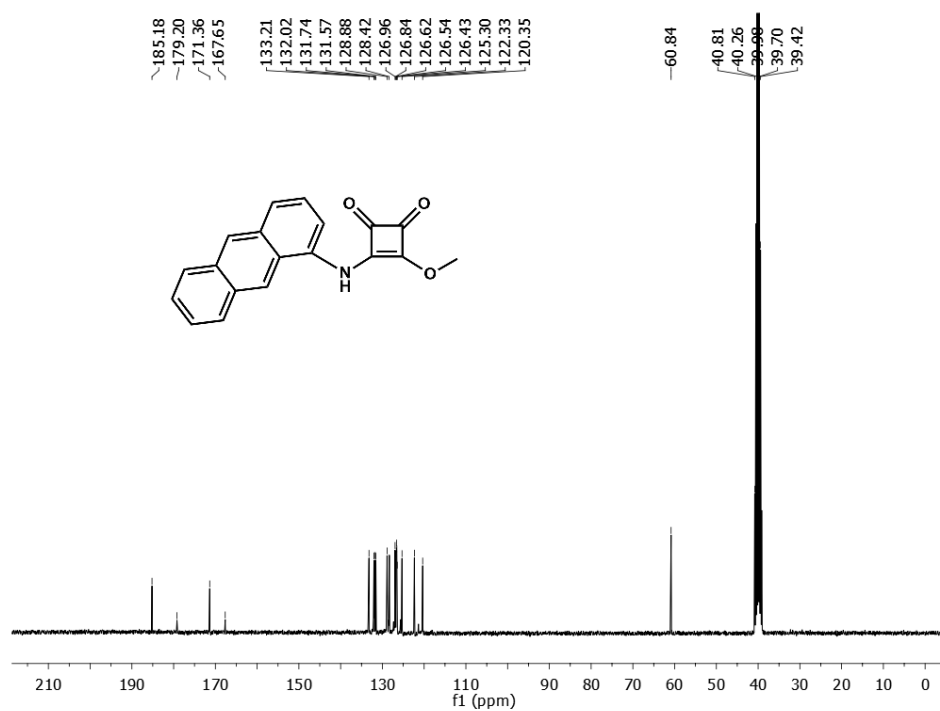

**Fig. S2.** <sup>13</sup>C NMR spectrum of compound **M1** in DMSO-d<sub>6</sub>.

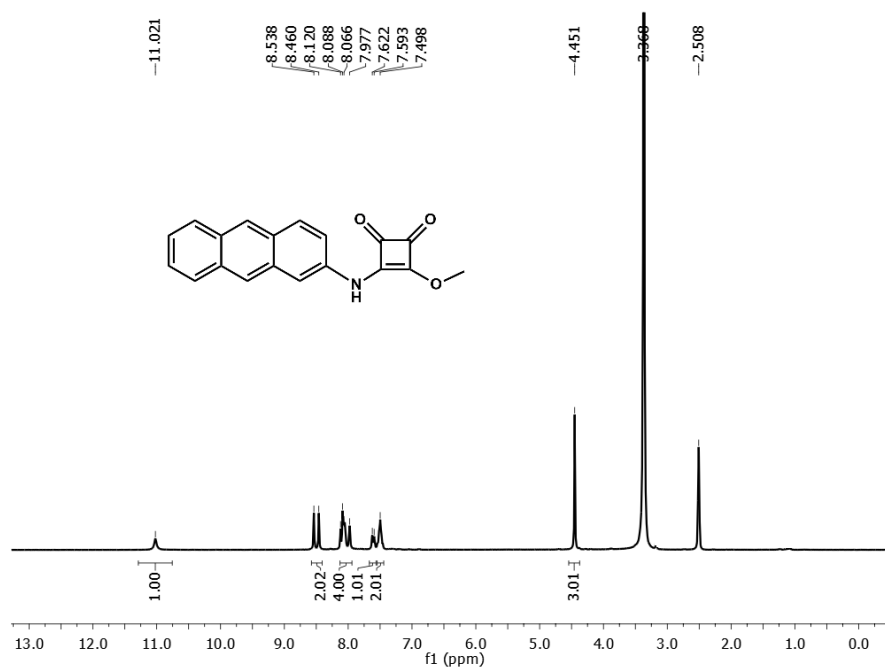

**Fig. S3.** <sup>1</sup>H NMR spectrum of compound **M2** in DMSO-d<sub>6</sub>.

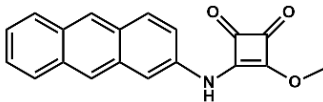

**Fig. S4.**  $^{13}\text{C}$  NMR spectrum of compound **M2** in DMSO- $d_6$ .

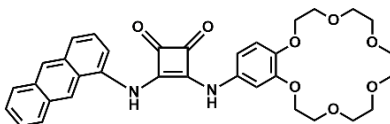

**Fig. S5.**  $^1\text{H}$  NMR spectrum of Receptor **1** in DMSO- $\text{d}_6$ .



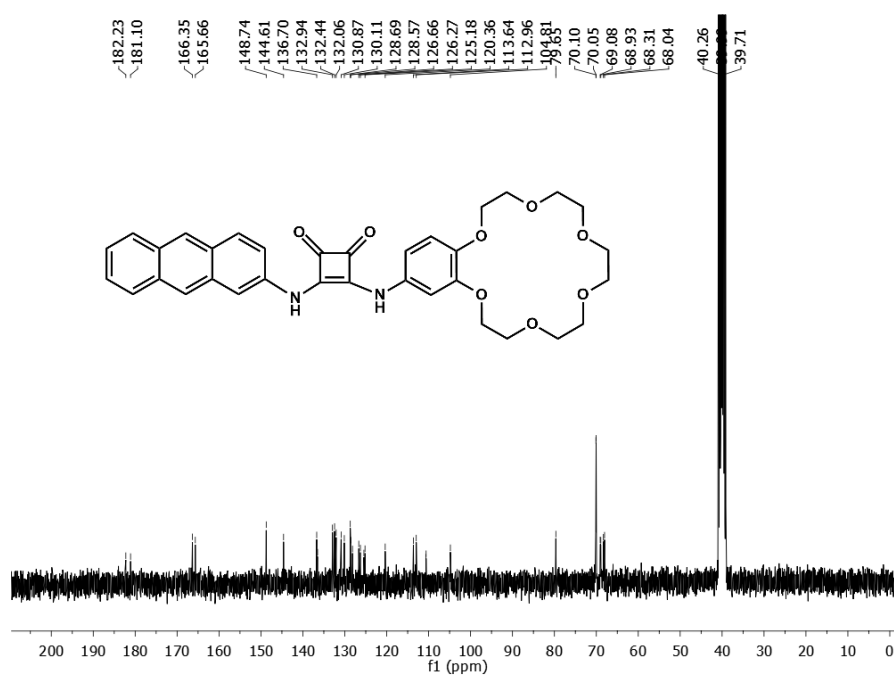

Fig. S8. <sup>13</sup>C NMR spectrum of Receptor 2 in DMSO-d<sub>6</sub>.

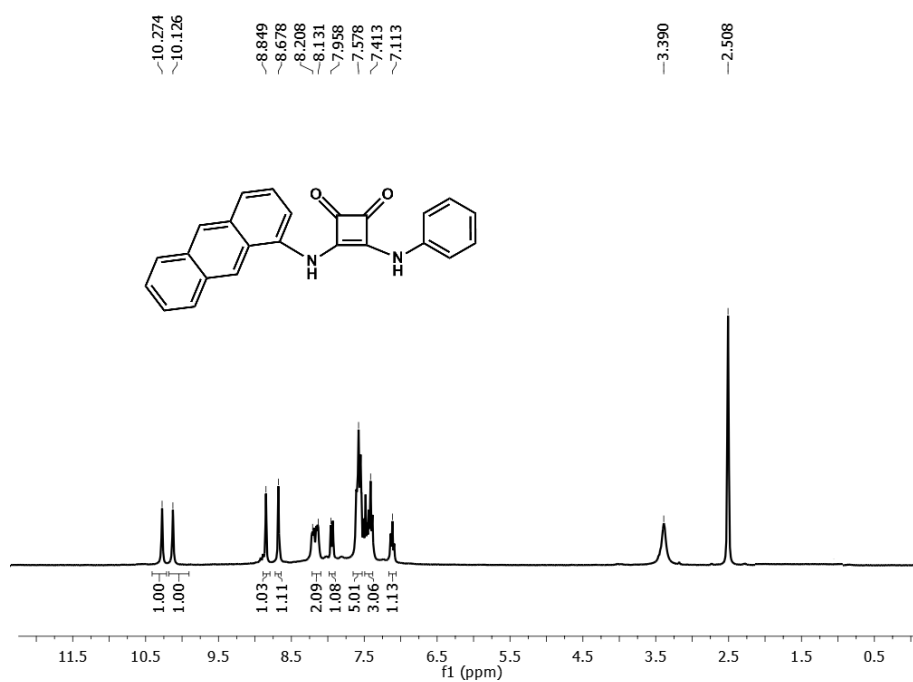

Fig. S9. <sup>1</sup>H NMR spectrum of Receptor 3 in DMSO-d<sub>6</sub>.

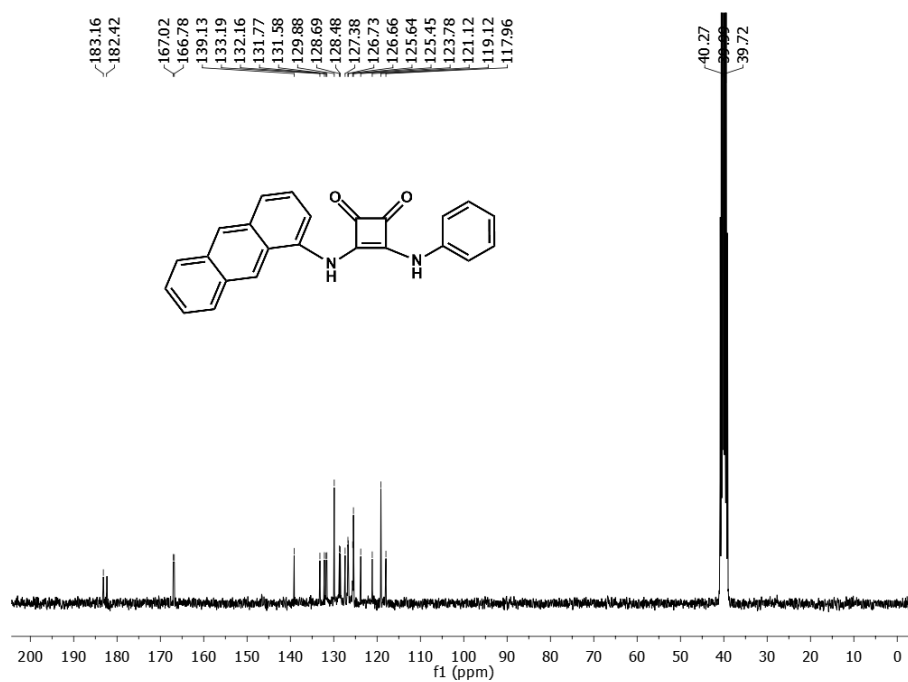

Fig. S10. <sup>13</sup>C NMR spectrum of Receptor 3 in DMSO-d<sub>6</sub>.

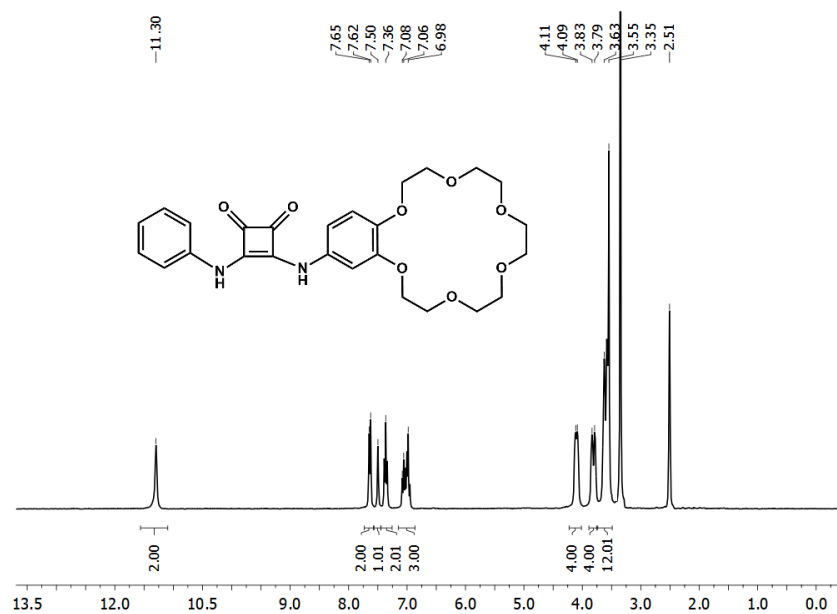

Fig. S11. <sup>1</sup>H NMR spectrum of Receptor 4 in DMSO-d<sub>6</sub>.

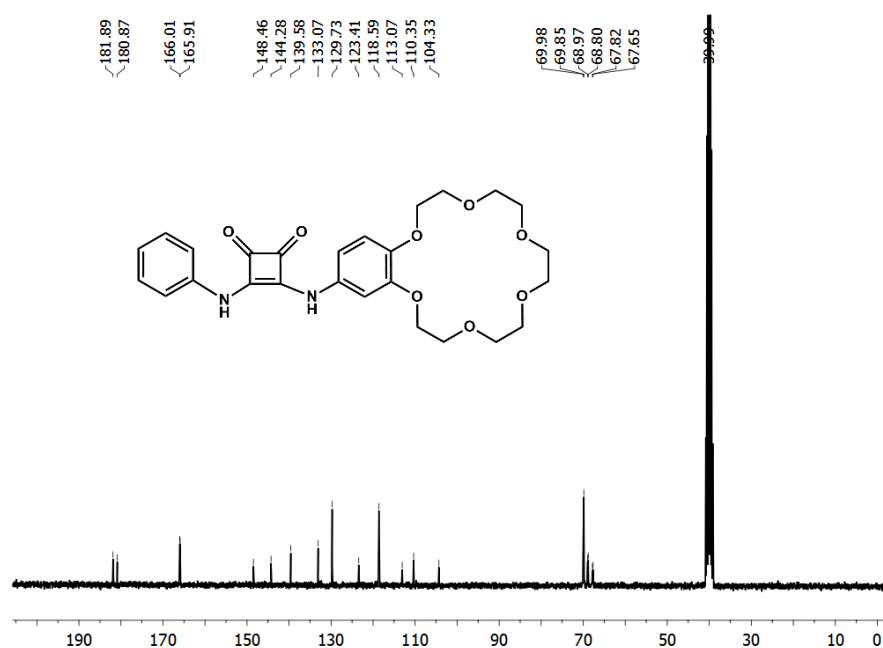

Fig. S12.  $^{13}\text{C}$  NMR spectrum of Receptor 4 in  $\text{DMSO-d}_6$ .

#### Dilution studies

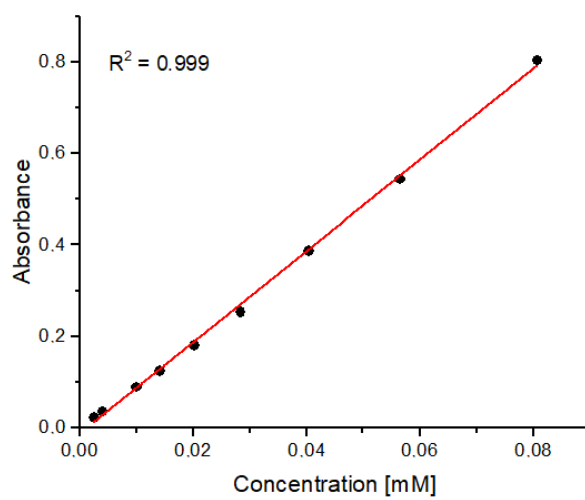

Fig. S13. Dilution curve of Receptor 1 in  $\text{CH}_3\text{CN}$ .

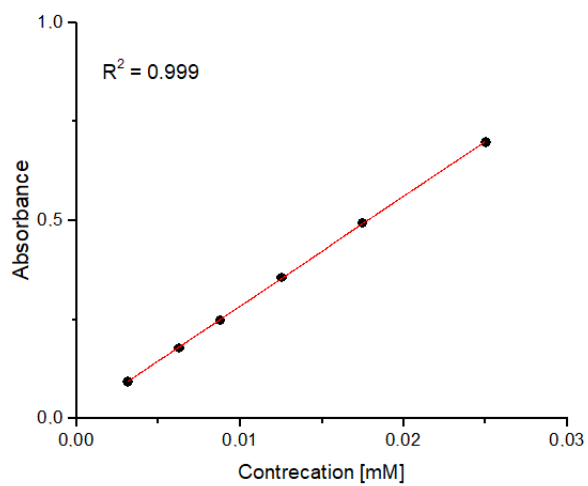

Fig. S14. Dilution curve of Receptor 2 in  $\text{CH}_3\text{CN}$ .

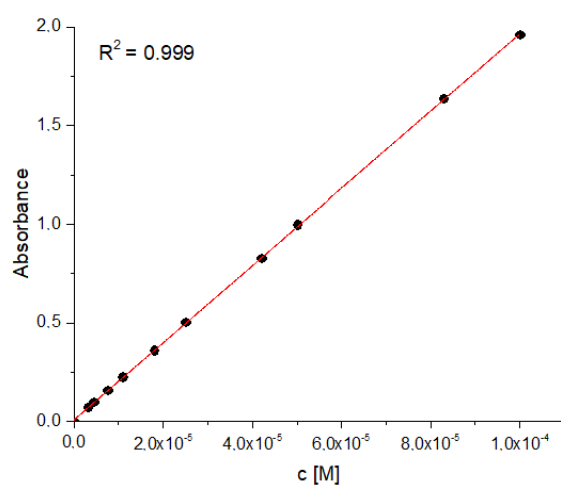

Fig. S15. Dilution curve of Receptor 4 in  $\text{CH}_3\text{CN}$ .

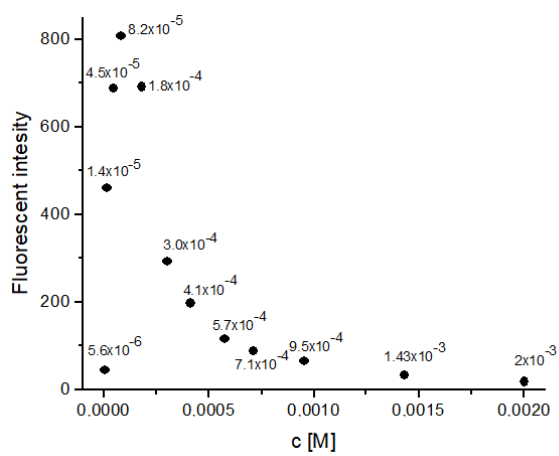

Fig. S16. Dilution curve of Receptor 1 in  $\text{CH}_3\text{CN}$  (excitation at 327 nm).

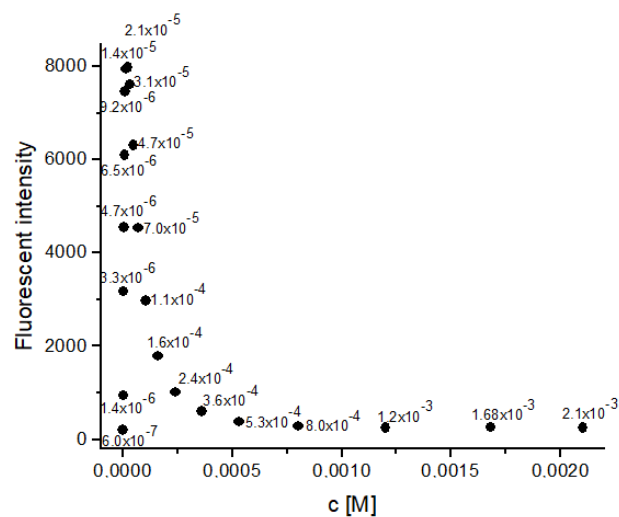

**Fig. S17.** Dilution curve of Receptor **2** in CH<sub>3</sub>CN (excitation at 345 nm).

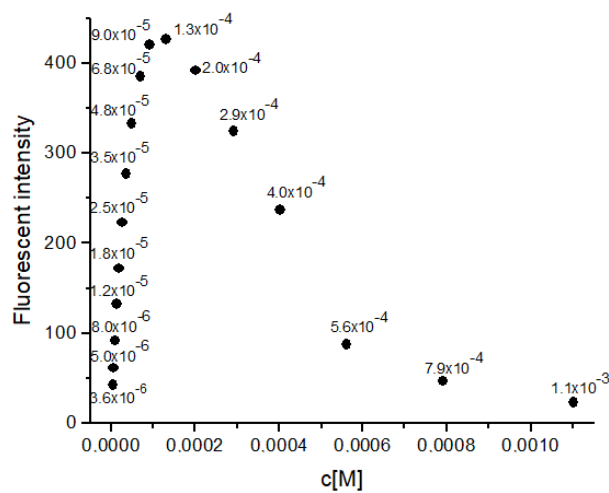

**Fig. S18.** Dilution curve of Receptor **3** in CH<sub>3</sub>CN (excitation at 390 nm).

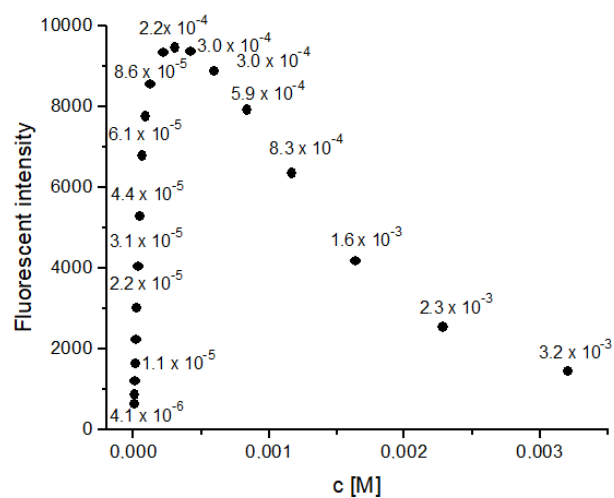

**Fig. S19.** Dilution curve of 1-aminoanthracene in CH<sub>3</sub>CN (excitation at 396 nm).

## UV-vis titration experiments

UV-vis titration experiments were performed on a Thermo Spectronic Unicam UV 500 spectrophotometer in CH<sub>3</sub>CN solution at 298K. To 10 mm cuvette was added 2.5 mL of freshly prepared (Receptor 1 –  $c = 2.6 \times 10^{-5}$  M, Receptor 2 –  $c = 1.7 \times 10^{-5}$  M, Receptor 3 –  $c = 3.1 \times 10^{-5}$  M; Receptor 4 –  $c = 2.1 \times 10^{-5}$  M) solution of studied receptor and in case of ion pair binding studies 1 mol equivalent of cation (KPF<sub>6</sub> or NaClO<sub>4</sub>) was added prior titrations. Small aliquots of ca.  $1.4 \times 10^{-3}$  M TBAX solution containing receptor 1, receptor 2 or receptor 3 at the same concentration as in cuvette, were added and a spectrum was acquired after each addition. The resulting titration data were analyzed using BindFit (v0.5) package, available online at <http://supramolecular.org>. Each titration was carried out in duplicate. Reported values are calculated as weighted arithmetic mean, where the weights were the errors obtained for each value separately. The given uncertainty of the association constants is the largest of the variance (external or internal).

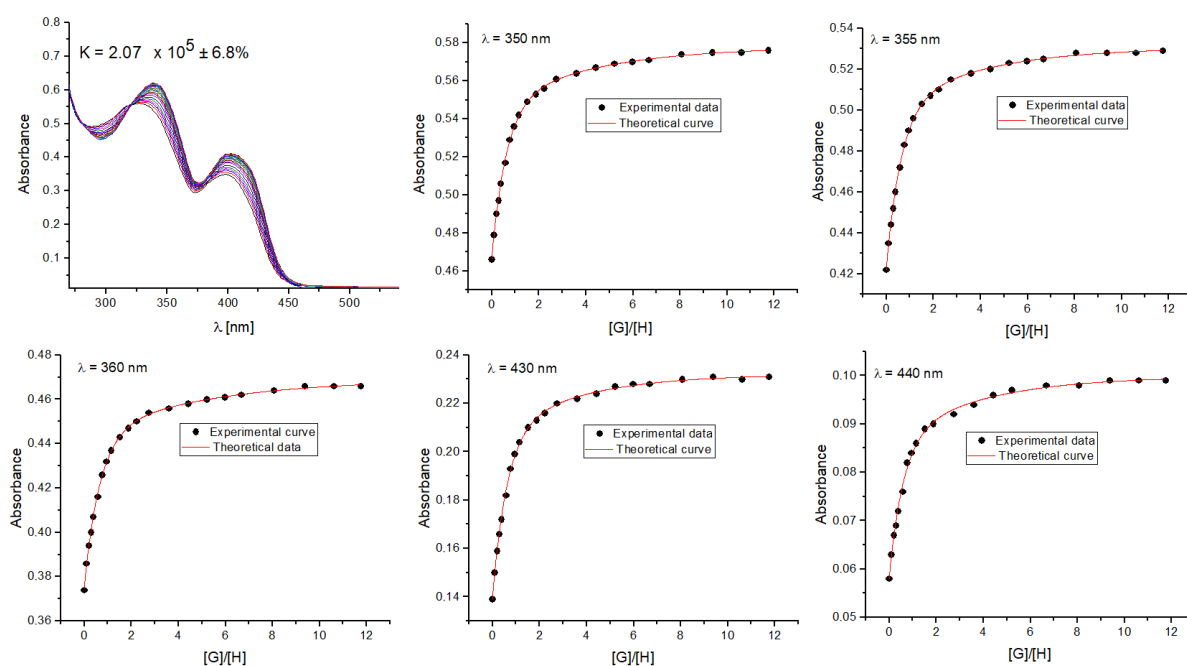

**Fig. S20.** UV-vis titration of Receptor 1 with TBACl in CH<sub>3</sub>CN and selected binding isotherms.

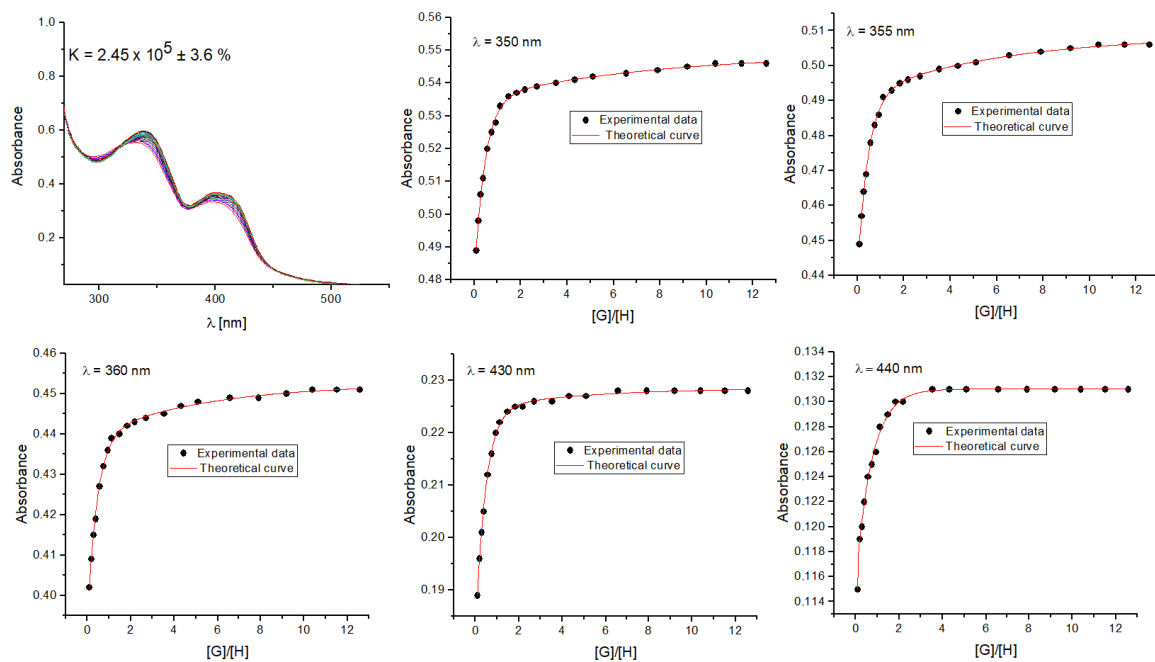

**Fig. S21.** UV-vis titration of Receptor **1** with TBACl in the presence of 1 equivalent of NaClO<sub>4</sub> in CH<sub>3</sub>CN and selected binding isotherms.

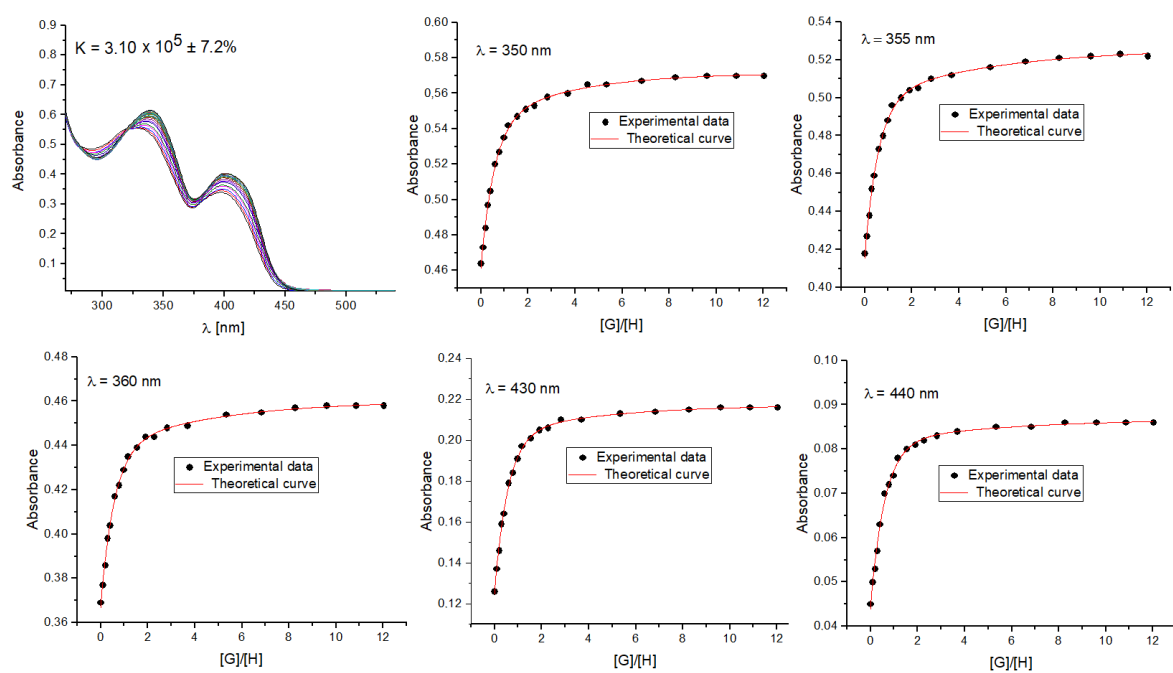

**Fig. S22.** UV-vis titration of Receptor **1** with TBACl in the presence of 1 equivalent of KPF<sub>6</sub> in CH<sub>3</sub>CN and selected binding isotherms.

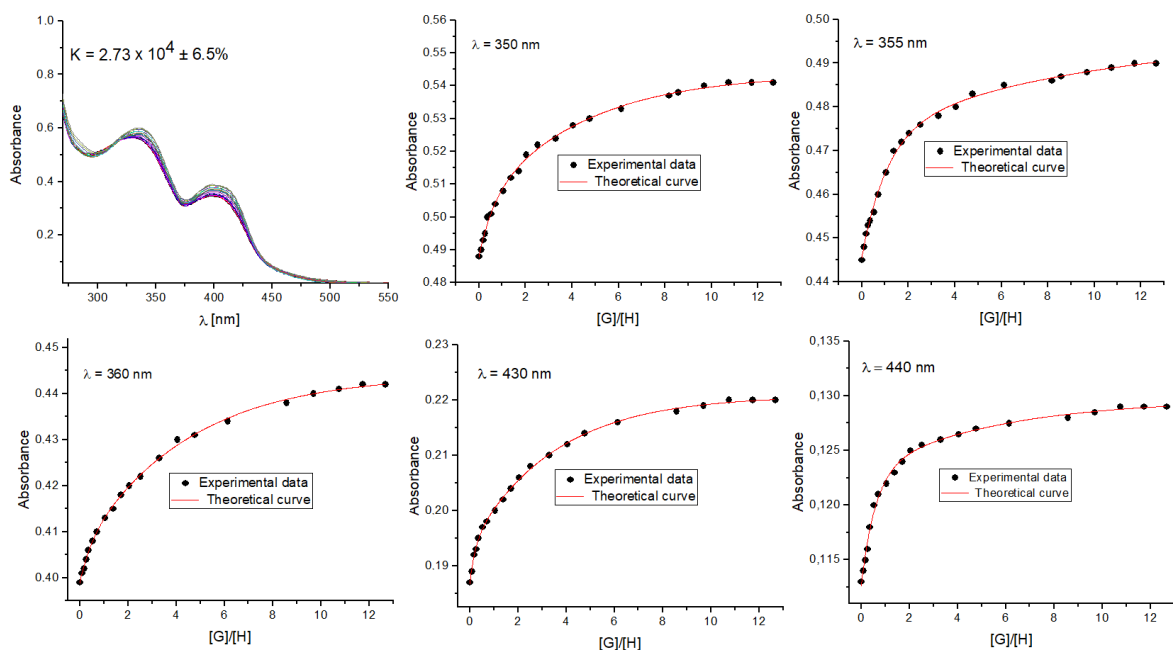

**Fig. S23.** UV-vis titration of Receptor **1** with TBABr in  $\text{CH}_3\text{CN}$  and selected binding isotherms.

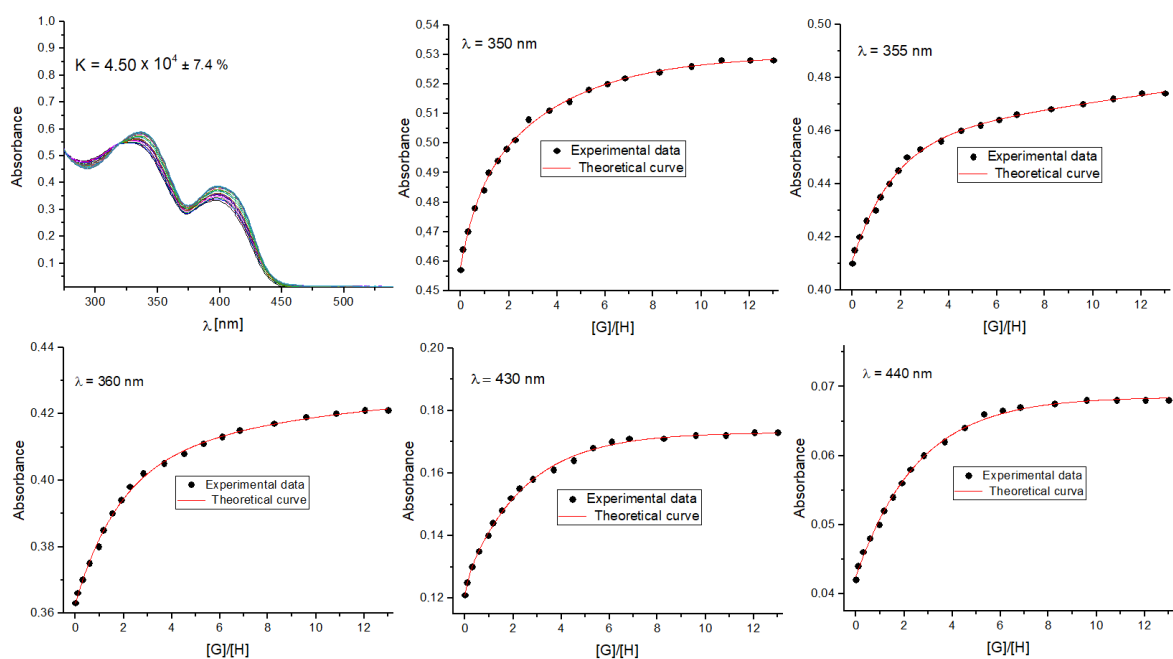

**Fig. S24.** UV-vis titration of Receptor **1** with TBABr in the presence of 1 equivalent of  $\text{KPF}_6$  in  $\text{CH}_3\text{CN}$  and selected binding isotherms.

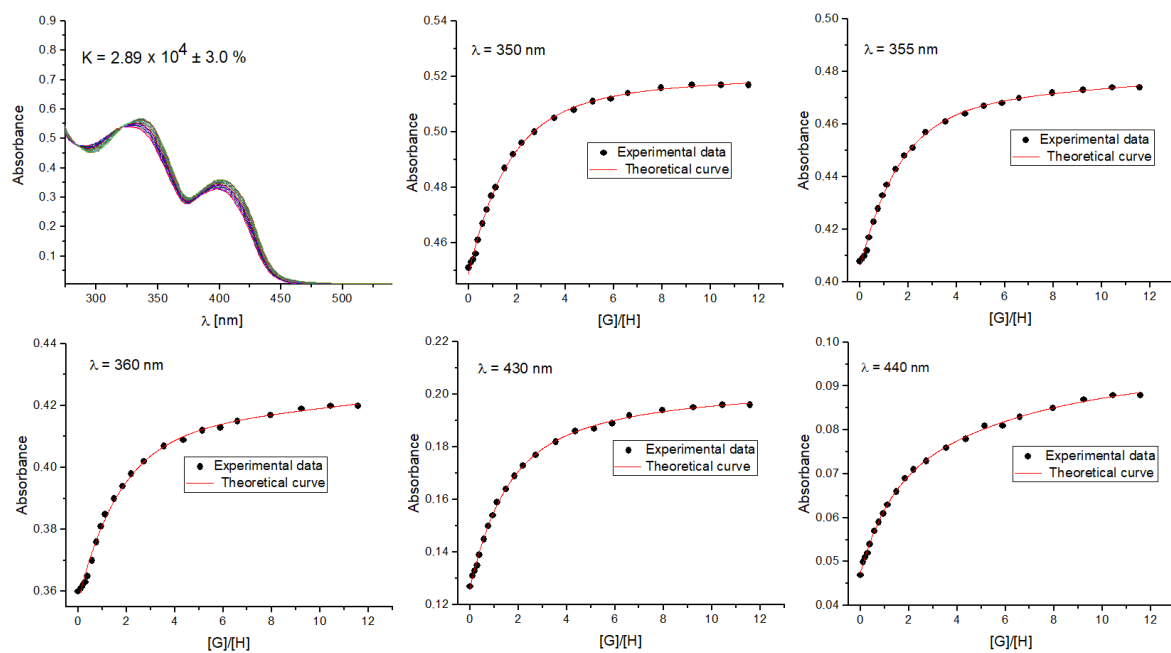

**Fig. S25.** UV-vis titration of Receptor **1** with TBANO<sub>2</sub> in CH<sub>3</sub>CN and selected binding isotherms.

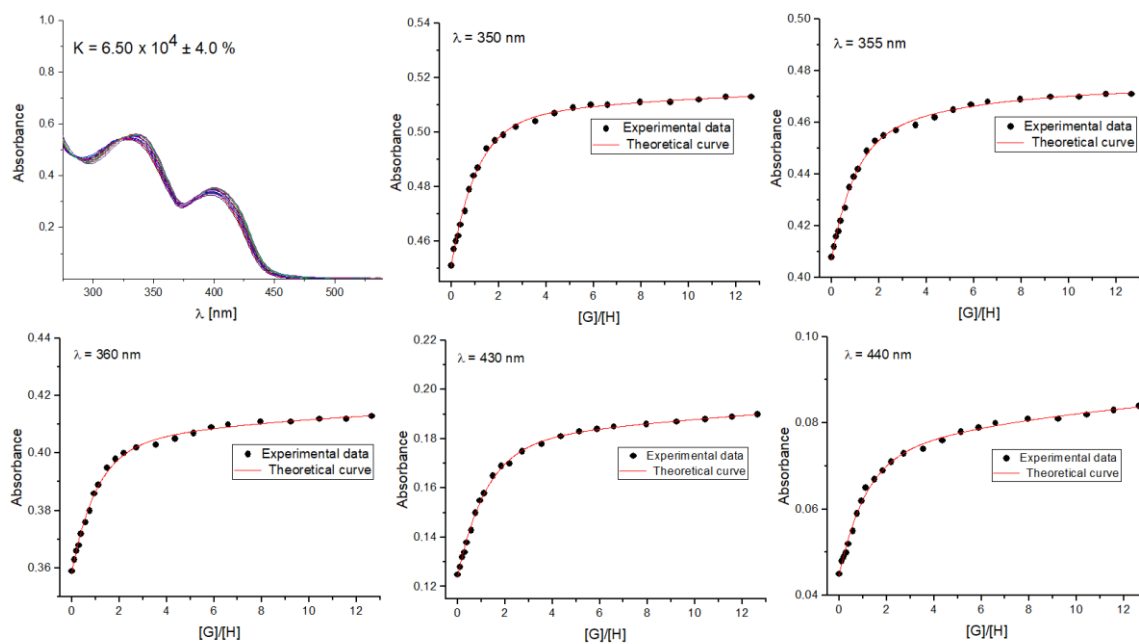

**Fig. S26.** UV-vis titration of Receptor **1** with TBANO<sub>2</sub> in the presence of 1 equivalent of KPF<sub>6</sub> in CH<sub>3</sub>CN and selected binding isotherms.

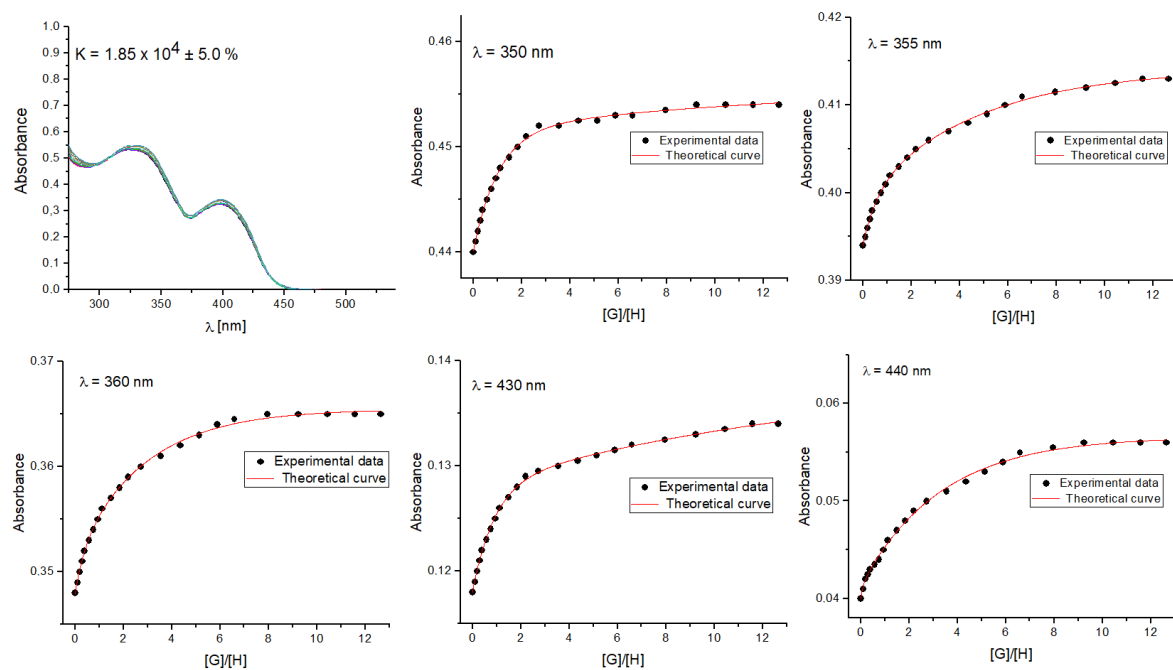

**Fig. S27.** UV-vis titration of Receptor **1** with TBANO<sub>3</sub> in CH<sub>3</sub>CN and selected binding isotherms.

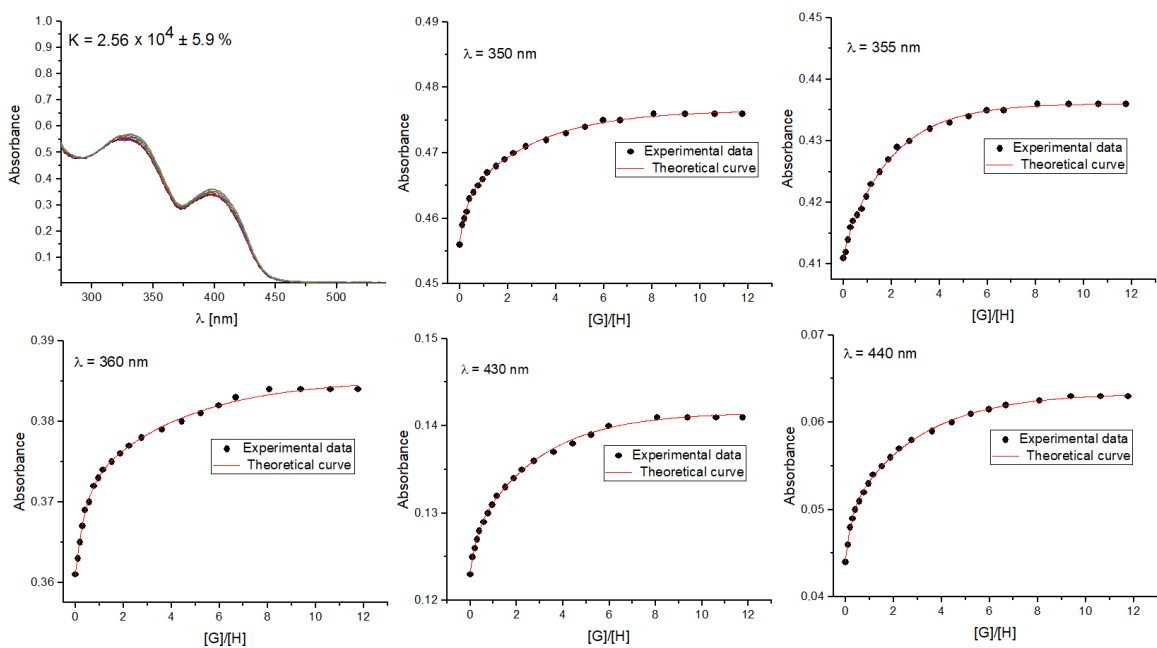

**Fig. S28.** UV-vis titration of Receptor **1** with TBANO<sub>3</sub> in the presence of 1 equivalent of KPF<sub>6</sub> in CH<sub>3</sub>CN and selected binding isotherms.

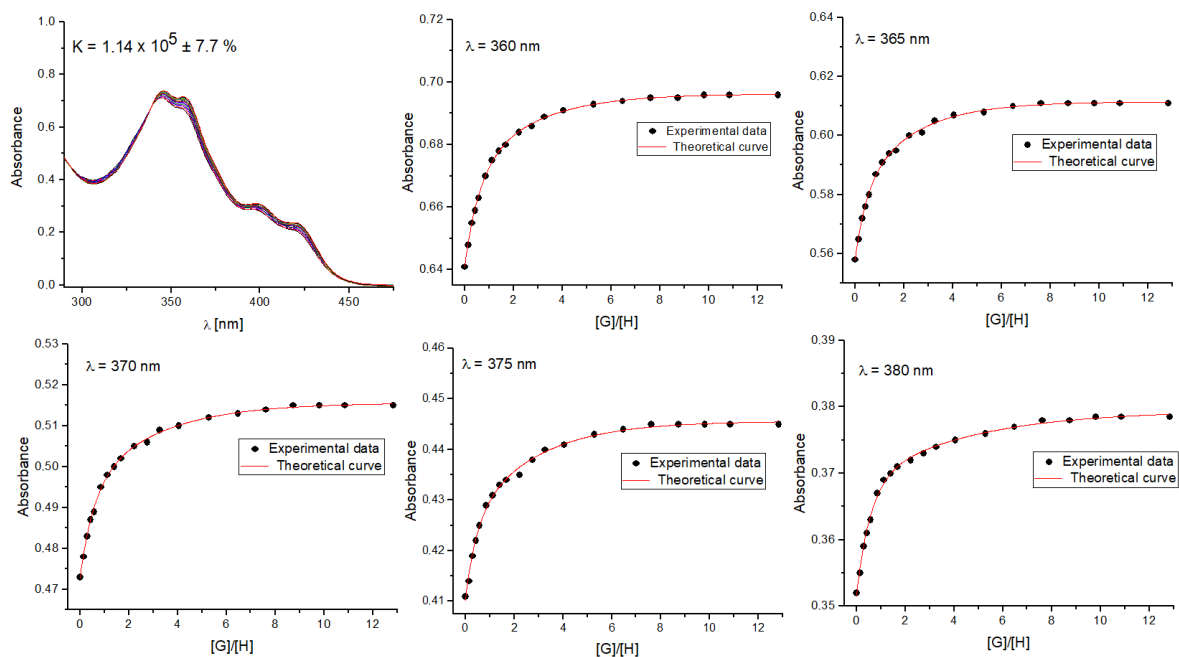

**Fig. S29.** UV-vis titration of Receptor 2 with TBACl in  $\text{CH}_3\text{CN}$  and selected binding isotherms.

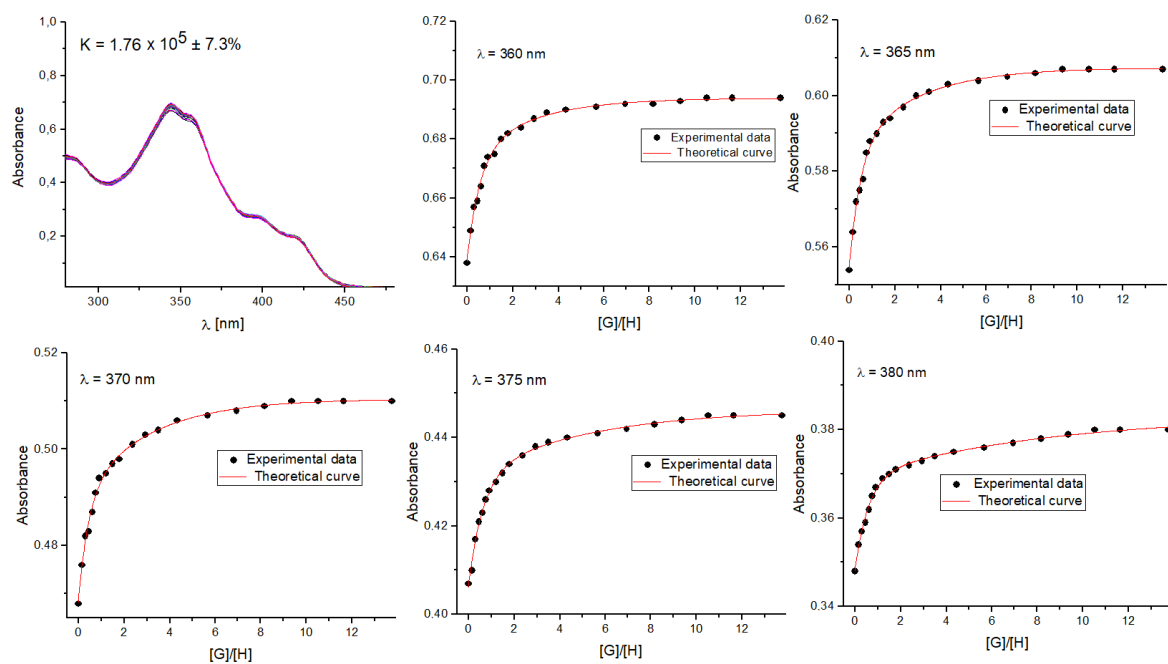

**Fig. S30.** UV-vis titration of Receptor 2 with TBACl in the presence of 1 equivalent of  $\text{NaClO}_4$  in  $\text{CH}_3\text{CN}$  and selected binding isotherms.

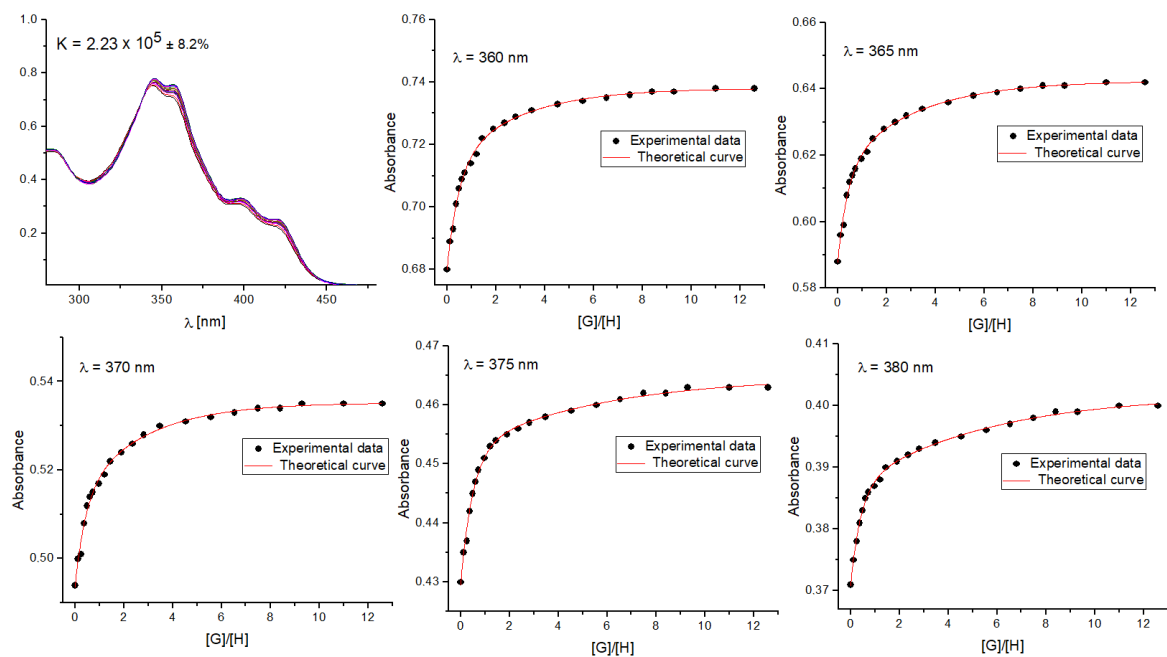

**Fig. S31.** UV-vis titration of Receptor **2** with TBACl in the presence of 1 equivalent of KPF<sub>6</sub> in CH<sub>3</sub>CN and selected binding isotherms.

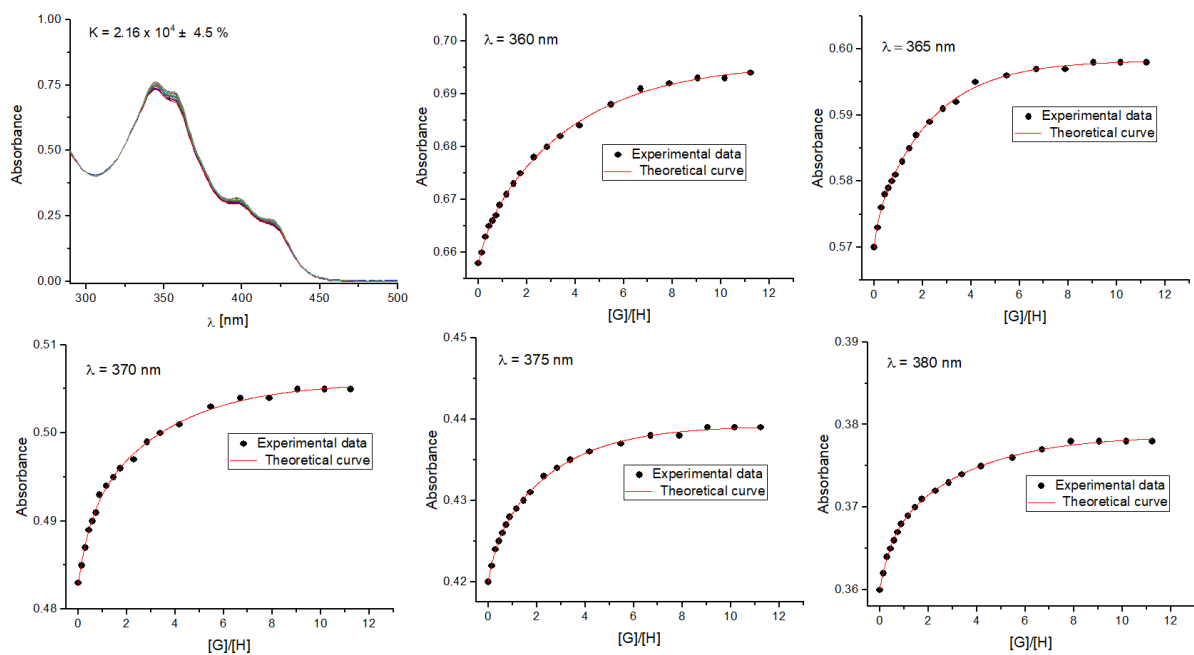

**Fig. S32.** UV-vis titration of Receptor **2** with TBABr in CH<sub>3</sub>CN and selected binding isotherms.

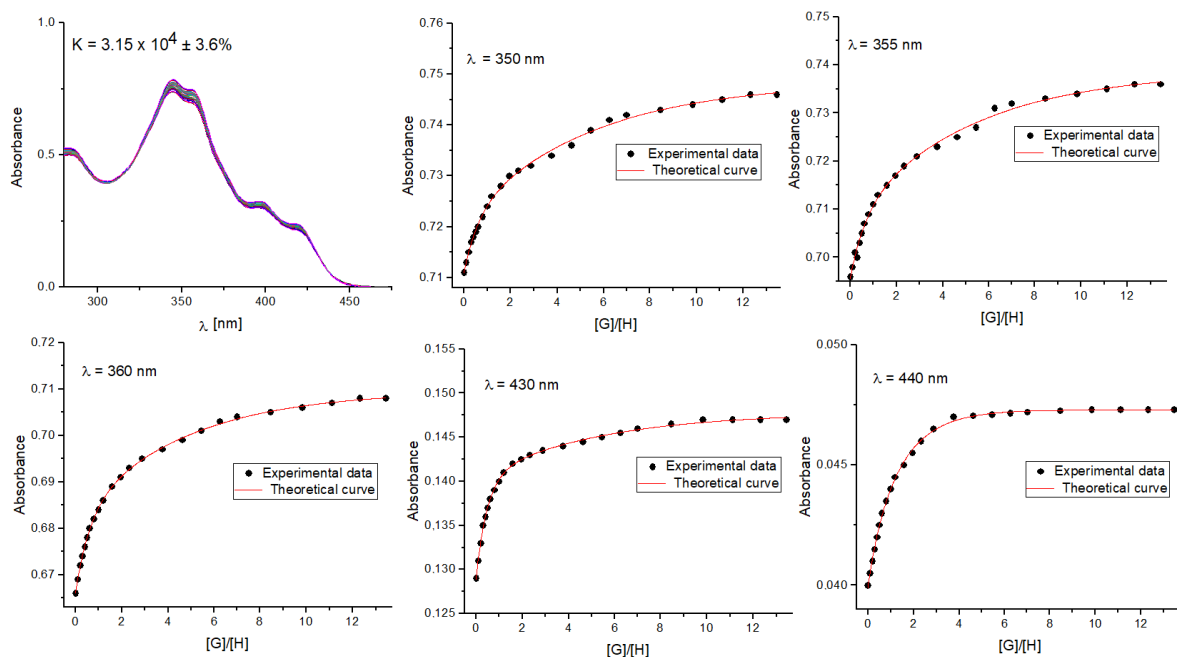

**Fig. S33.** UV-vis titration of Receptor **2** with TBABr in the presence of 1 equivalent of KPF<sub>6</sub> in CH<sub>3</sub>CN and selected binding isotherms.

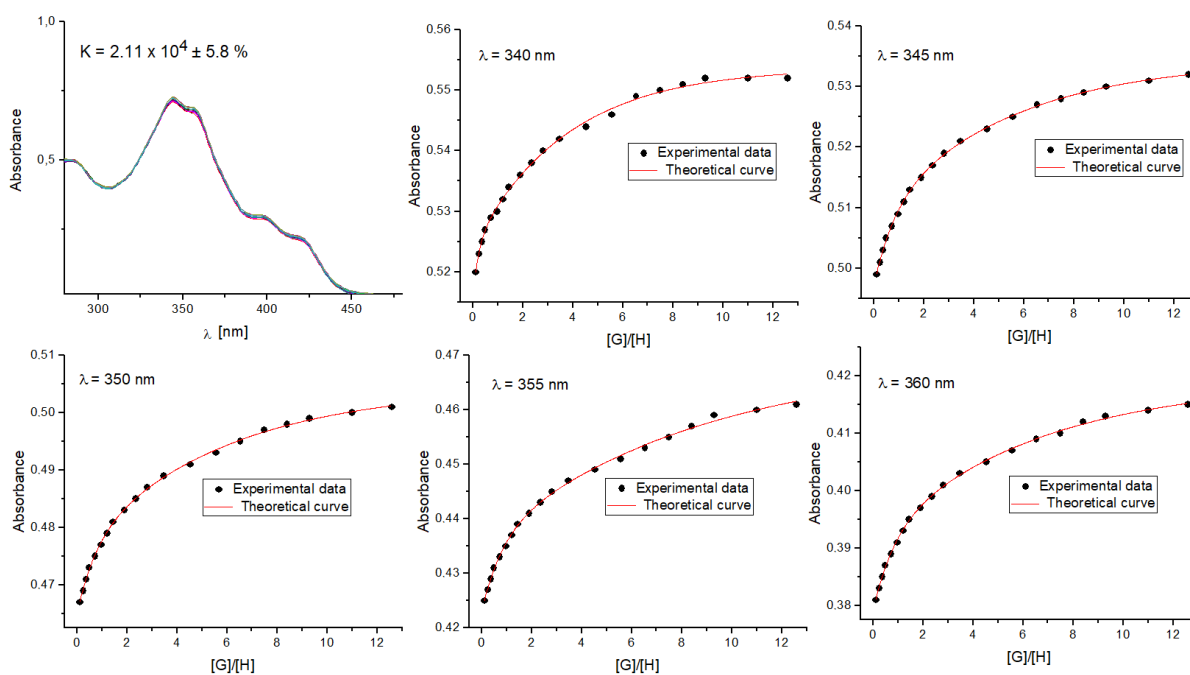

**Fig. S34.** UV-vis titration of Receptor **2** with TBANO<sub>2</sub> in CH<sub>3</sub>CN and selected binding isotherms.

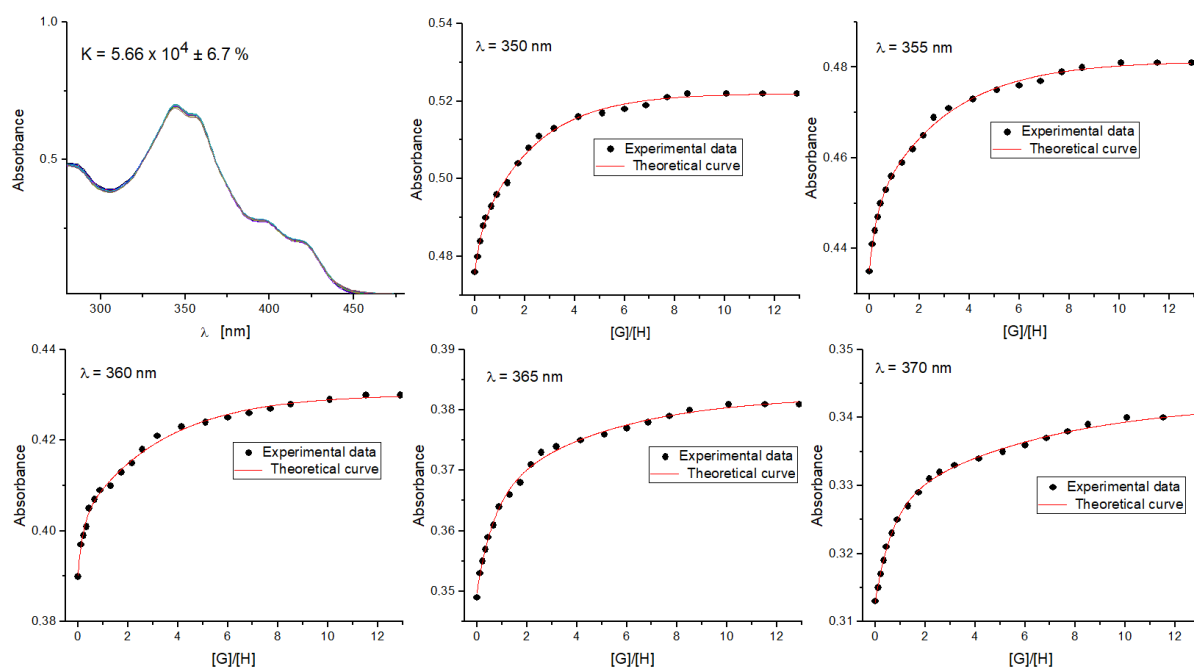

**Fig. S35.** UV-vis titration of Receptor **2** with TBANO<sub>2</sub> in the presence of 1 equivalent of KPF<sub>6</sub> in CH<sub>3</sub>CN and selected binding isotherms.

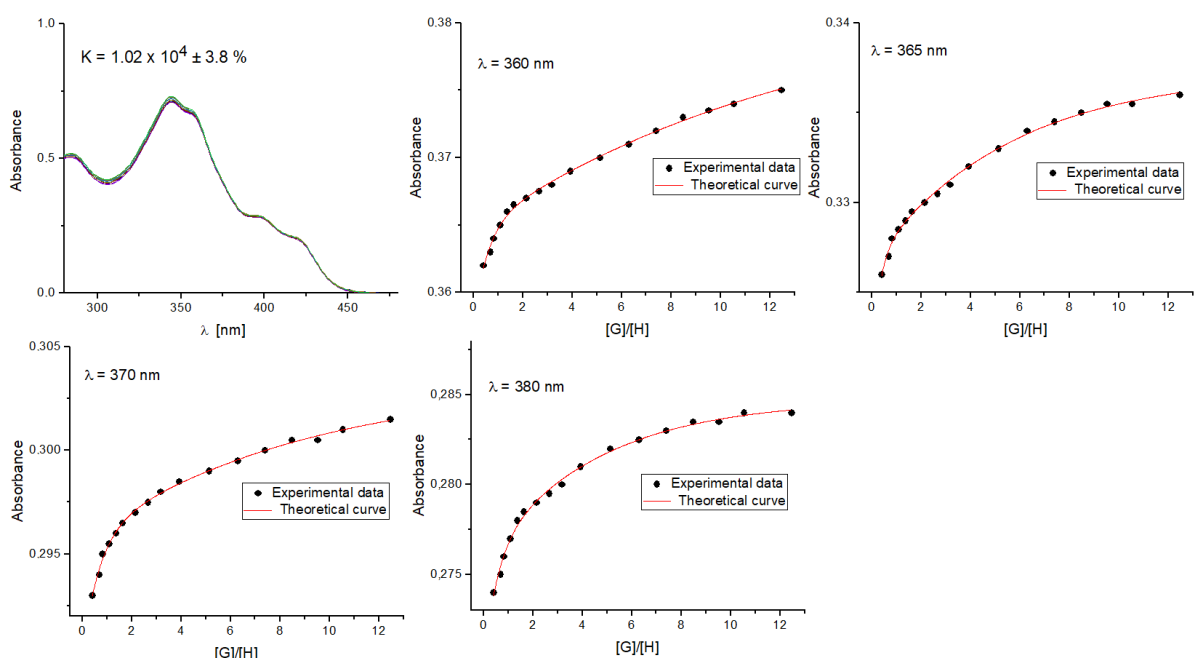

**Fig. S36.** UV-vis titration of Receptor **2** with TBANO<sub>3</sub> in CH<sub>3</sub>CN and selected binding isotherms.

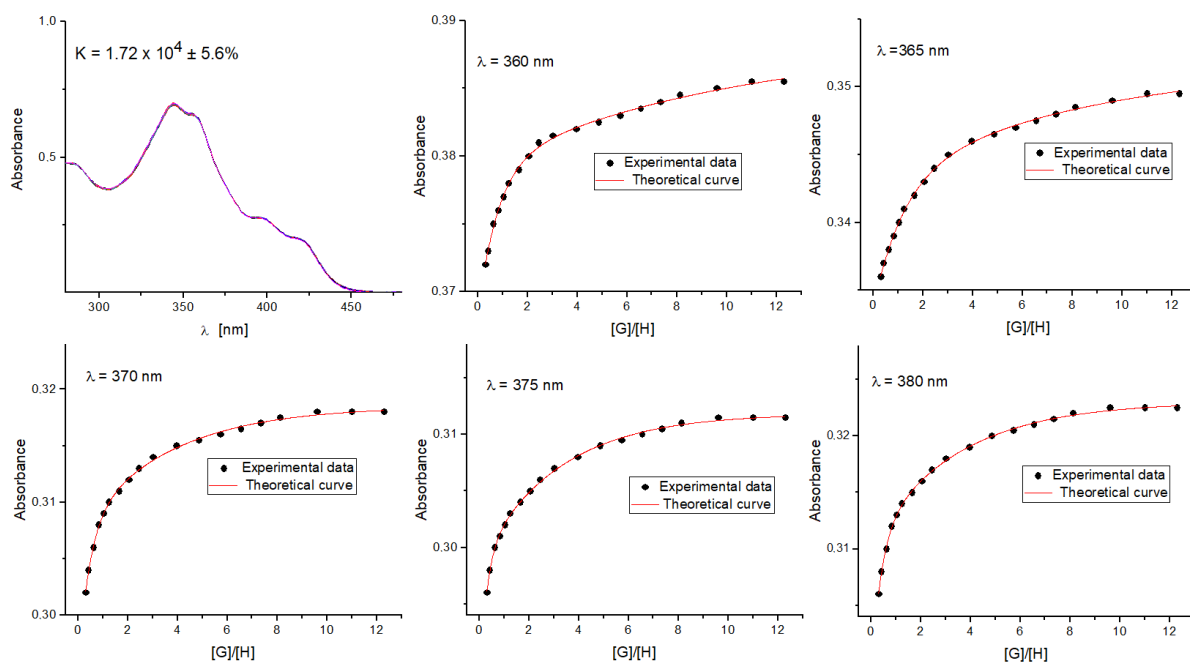

**Fig. S37.** UV-vis titration of Receptor **2** with TBANO<sub>3</sub> in the presence of 1 equivalent of KPF<sub>6</sub> in CH<sub>3</sub>CN and selected binding isotherms.

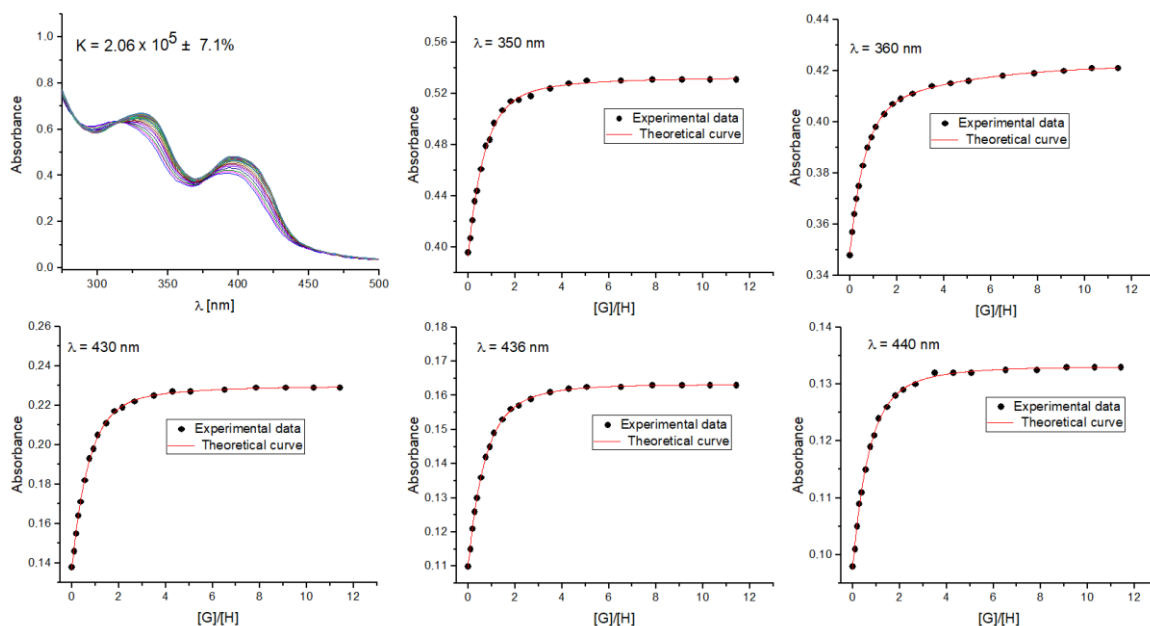

**Fig. S38.** UV-vis titration of Receptor **3** with TBACl in CH<sub>3</sub>CN and selected binding isotherms.

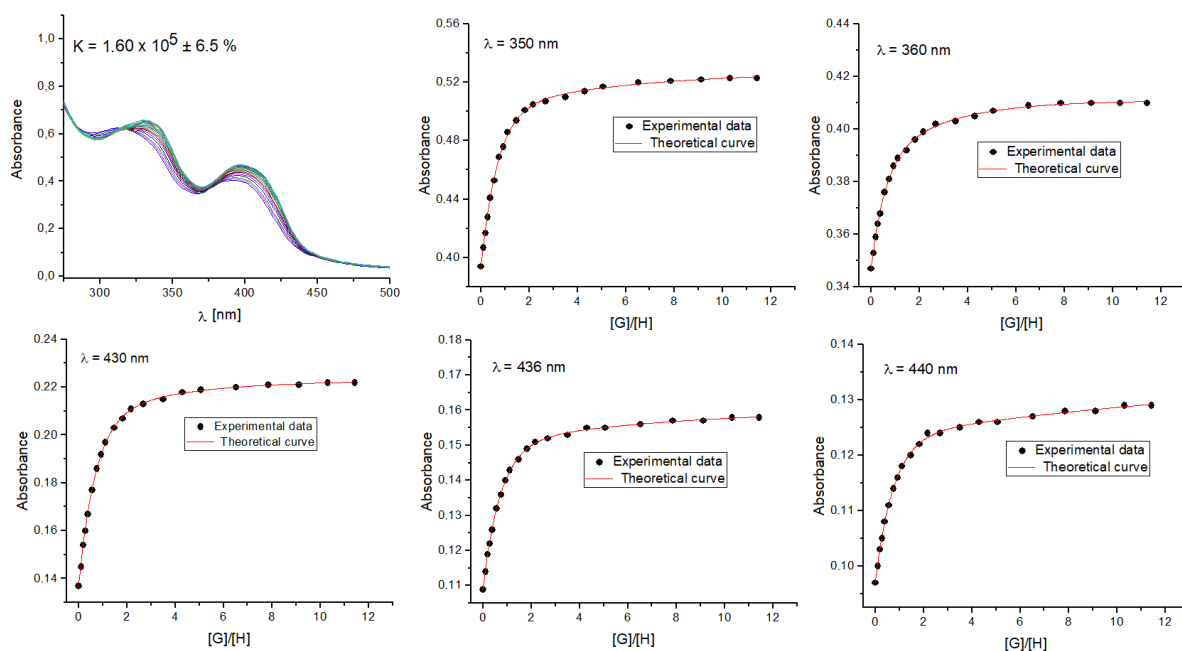

**Fig. S39.** UV-vis titration of Receptor 3 with TBACl in the presence of 1 equivalent of NaClO<sub>4</sub> in CH<sub>3</sub>CN and selected binding isotherms.

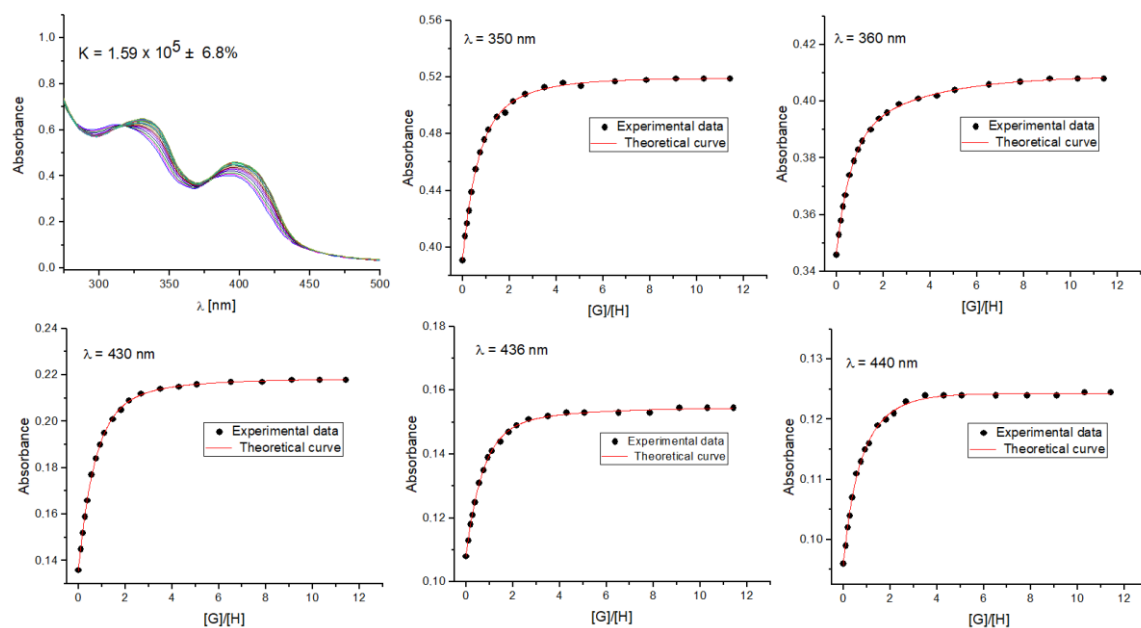

**Fig. S40.** UV-vis titration of Receptor 3 with TBACl in the presence of 1 equivalent of KPF<sub>6</sub> in CH<sub>3</sub>CN and selected binding isotherms.

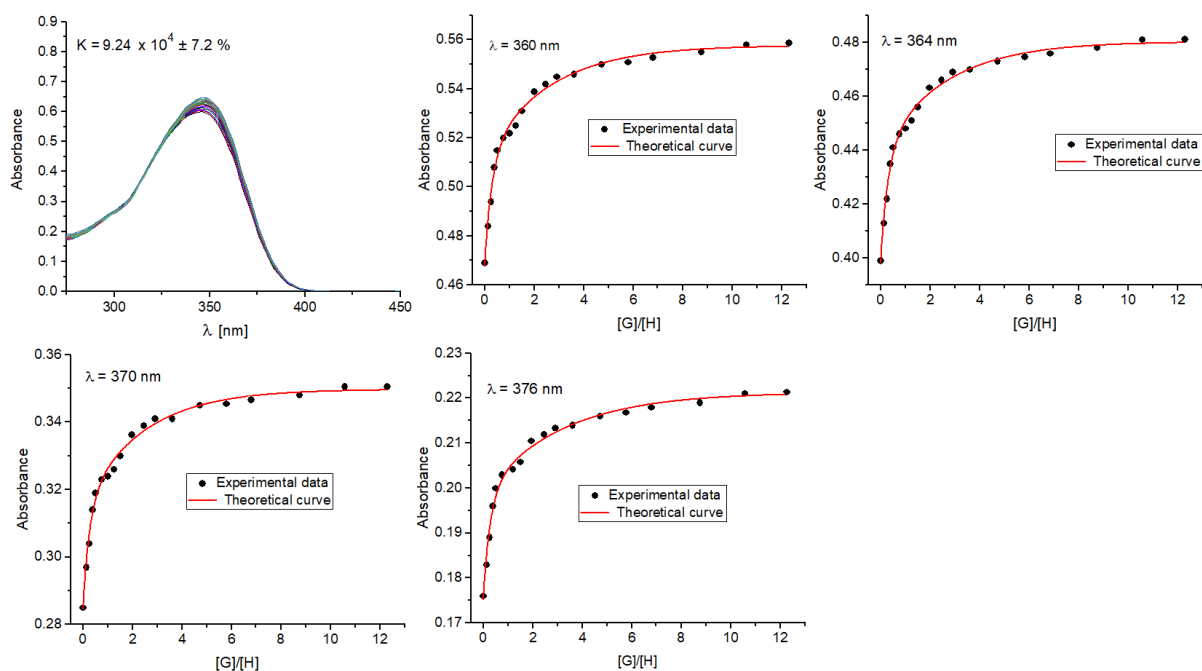

**Fig. S41.** UV-vis titration of Receptor **4** with TBACl in CH<sub>3</sub>CN and selected binding isotherms.

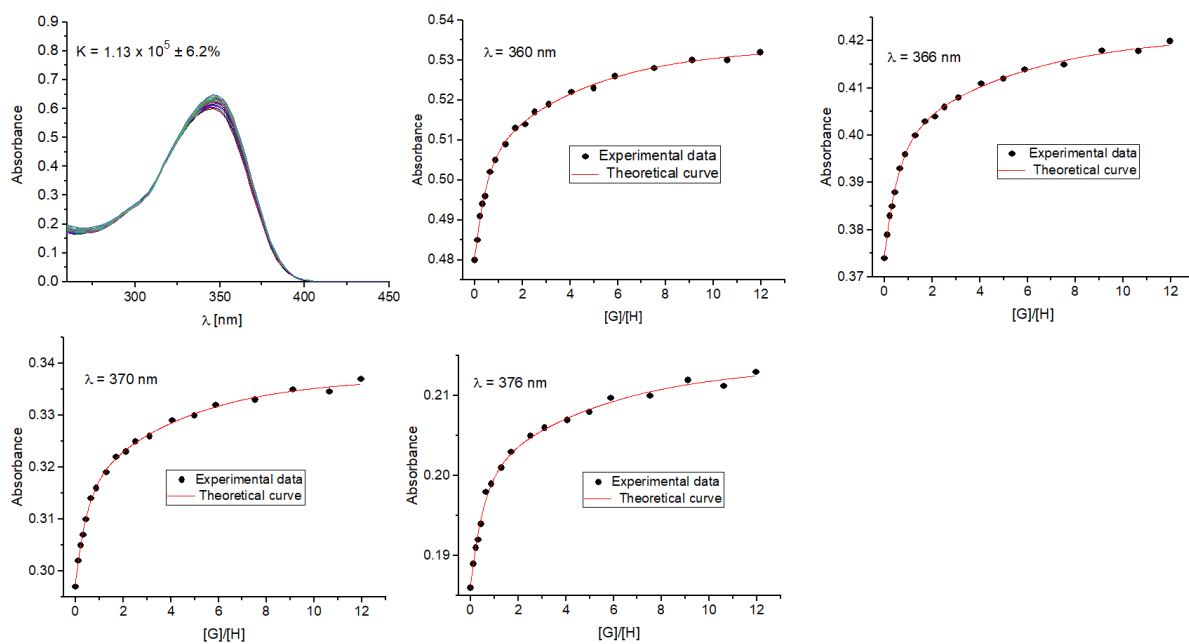

**Fig. S42.** UV-vis titration of Receptor **4** with TBACl in the presence of 1 equivalent of NaClO<sub>4</sub> in CH<sub>3</sub>CN and selected binding isotherms.

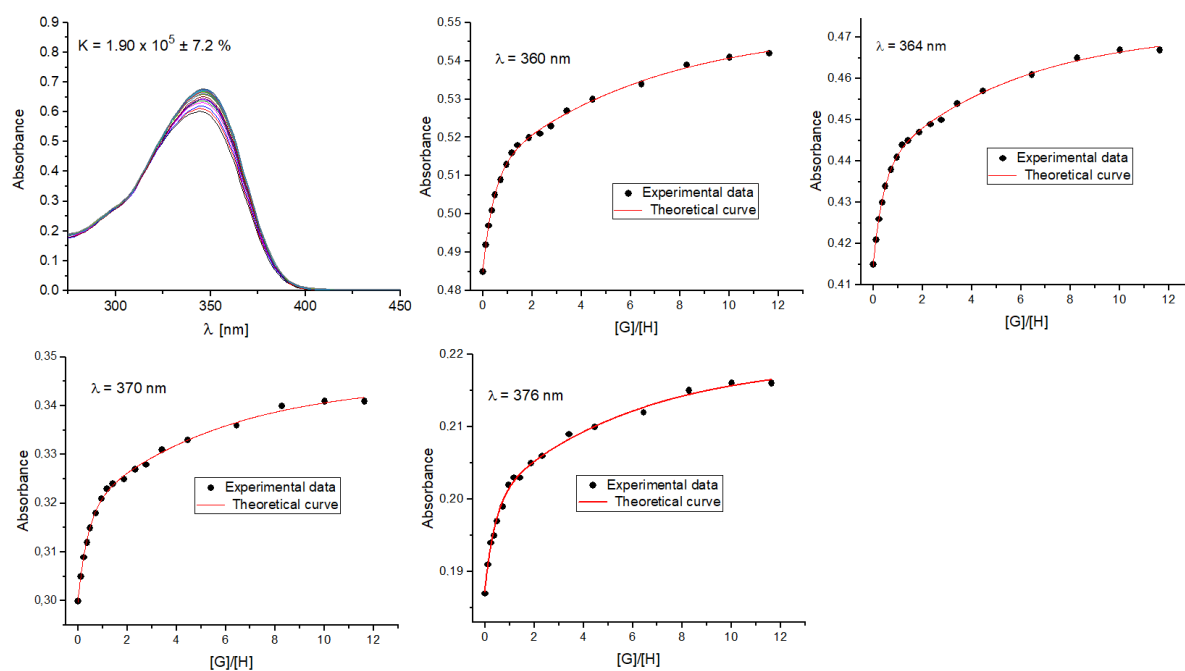

**Fig. S43.** UV-vis titration of Receptor **4** with TBACl in the presence of 1 equivalent of KPF<sub>6</sub> in CH<sub>3</sub>CN and selected binding isotherms.

### NMR titration experiments

The <sup>1</sup>H NMR titration was conducted at 298K in CD<sub>3</sub>CN. In each case, a 500 μL of freshly prepared 1.6 mM solution of Receptor **1** (1.4 mM of Receptor **2**) was added to a 5 mm NMR tube. In the case of ion pair titration, the receptor was firstly pretreated with one equivalent of KPF<sub>6</sub>. Then small aliquots of solution of TBAX, containing receptor at constant concentration, were added and a spectrum was acquired after each addition. The resulting titration data were analyzed using BindFit (v0.5) package, available online at <http://supramolecular.org>.

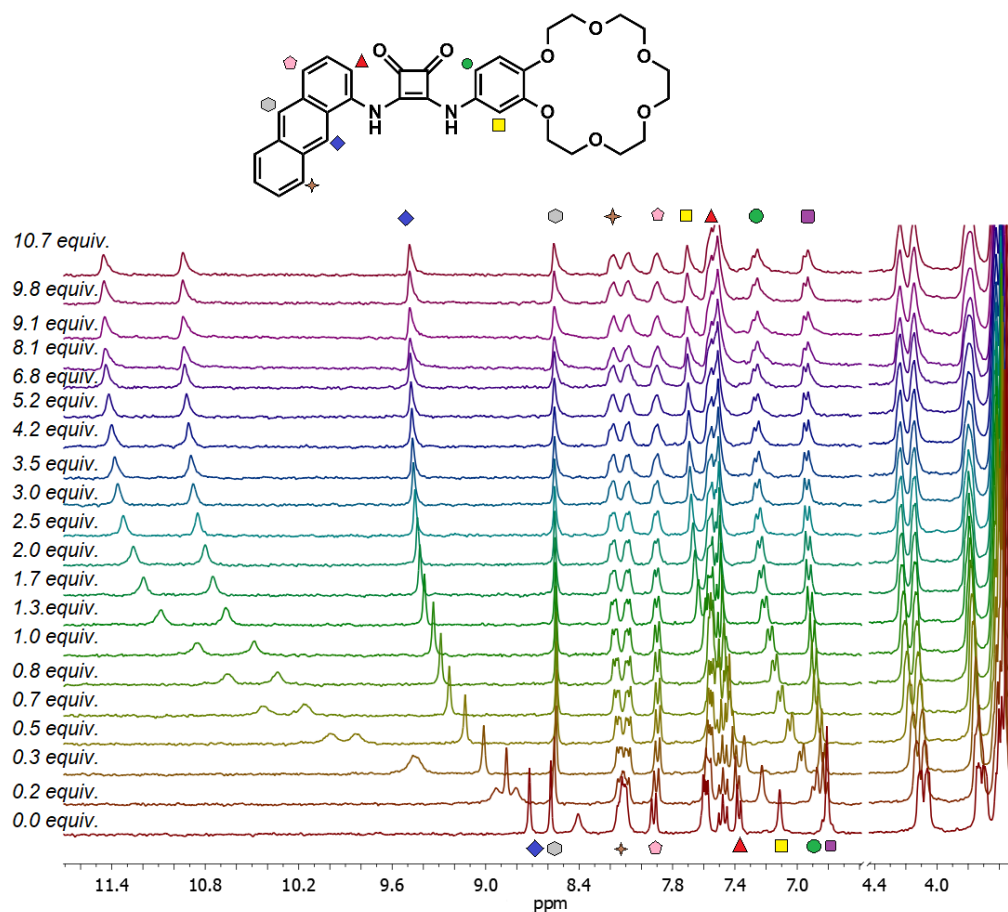

**Fig. S44.** Partial  $^1\text{H}$ NMR spectra recorded upon titration of **1** in  $\text{CD}_3\text{CN}$  with TBABr.

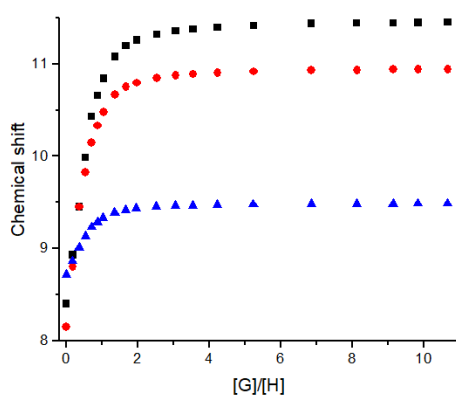

**Fig. S45.**  $^1\text{H}$  NMR titration binding isotherms of **1** in  $\text{CD}_3\text{CN}$  upon addition of increasing amounts of TBABr.

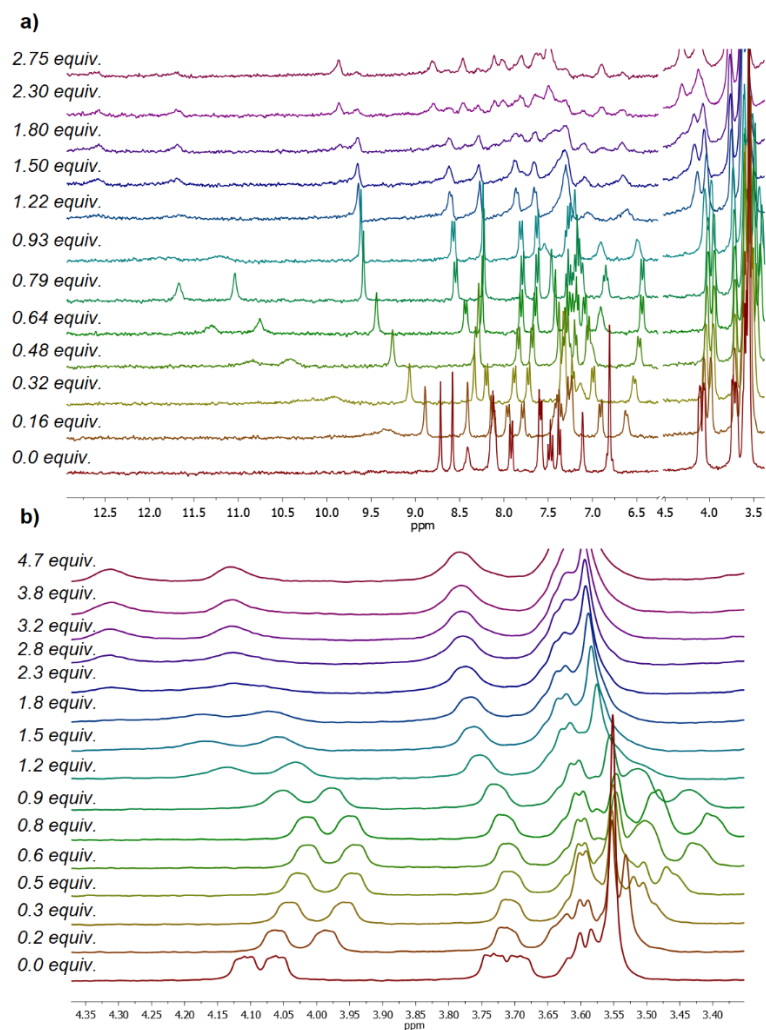

**Fig. S46.**  $^1\text{H}$  NMR spectra recorded upon titration of receptor **1** in  $\text{CD}_3\text{CN}$  with  $\text{TBA}_2\text{SO}_4$  titration performed in the range from 0.0 equiv. to 2.75 equiv. - a) ( signals corresponding to the crown ether - b).

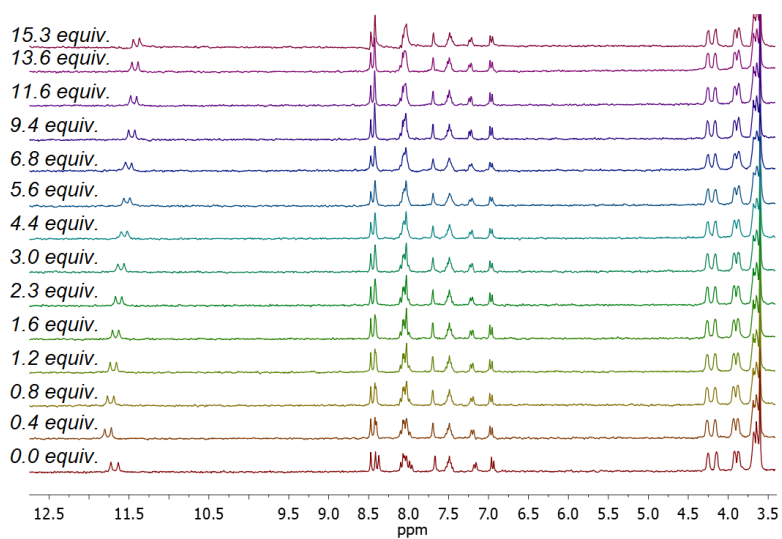

**Fig. S47.** Partial  $^1\text{H}$ NMR spectra were recorded upon titration of **2** in  $\text{CD}_3\text{CN}$  with  $\text{TBABr}$ .

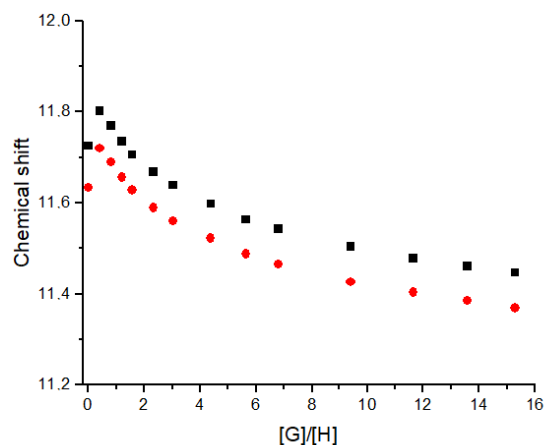

**Fig. S48.**  $^1\text{H}$  NMR titration binding isotherms of **2** in  $\text{CD}_3\text{CN}$  upon addition of increasing amounts of TBABr.

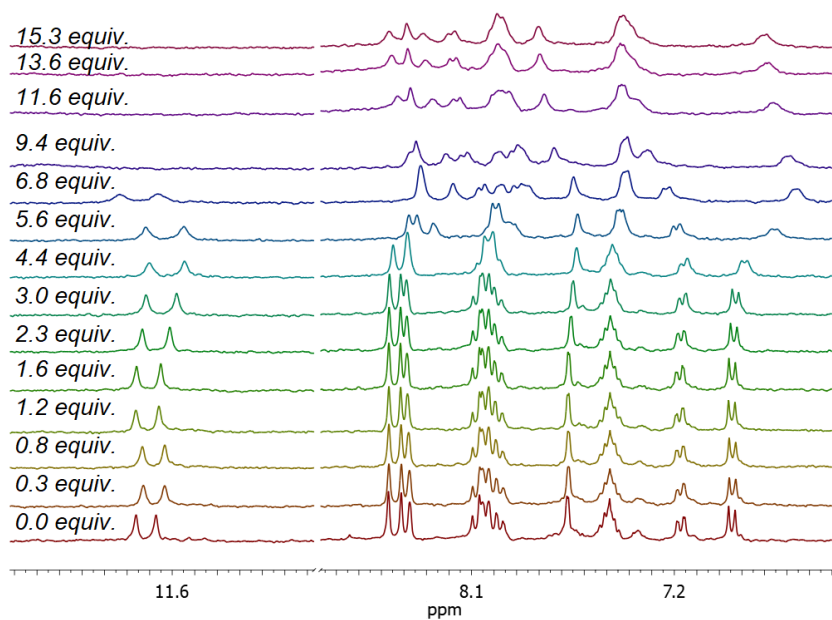

**Fig. S49.** Partial  $^1\text{H}$ NMR spectra were recorded upon titration of **2** in  $\text{CD}_3\text{CN}$  with  $\text{TBA}_2\text{SO}_4$  (signals corresponding to amide and phenyl protons).

## <sup>1</sup>H DOSY and 2D experiments

**Table S1.** Diffusion coefficients during dilutions for Receptors **1** and **2** in CD<sub>3</sub>CN.

| c [mM] | Receptor 1                                       | Receptor 2                                      |
|--------|--------------------------------------------------|-------------------------------------------------|
| 3.9    | 0.954 e-5 (1e-7) cm <sup>2</sup> s <sup>-1</sup> | 0.984e-5 (1e-7) cm <sup>2</sup> s <sup>-1</sup> |
| 1.2    | 1.000 e-5 (2e-7) cm <sup>2</sup> s <sup>-1</sup> | 1.014e-5 (2e-7) cm <sup>2</sup> s <sup>-1</sup> |
| 0.6    | 1.035 e-5 (3e-7) cm <sup>2</sup> s <sup>-1</sup> | 1.031e-5 (3e-7) cm <sup>2</sup> s <sup>-1</sup> |

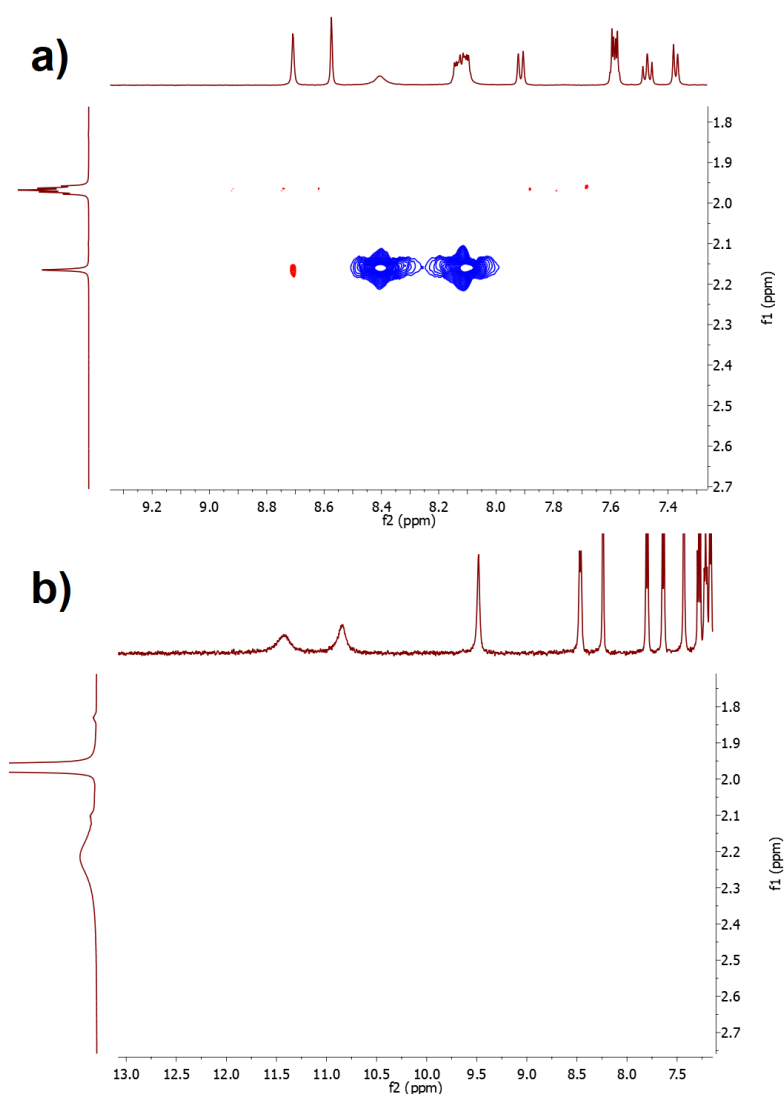

**Fig. S50.** ROESY NMR spectrum of receptor **1** (2.4 mM) in CD<sub>3</sub>CN (a) and after addition of 0.6 equiv. TBA<sub>2</sub>SO<sub>4</sub> (b).

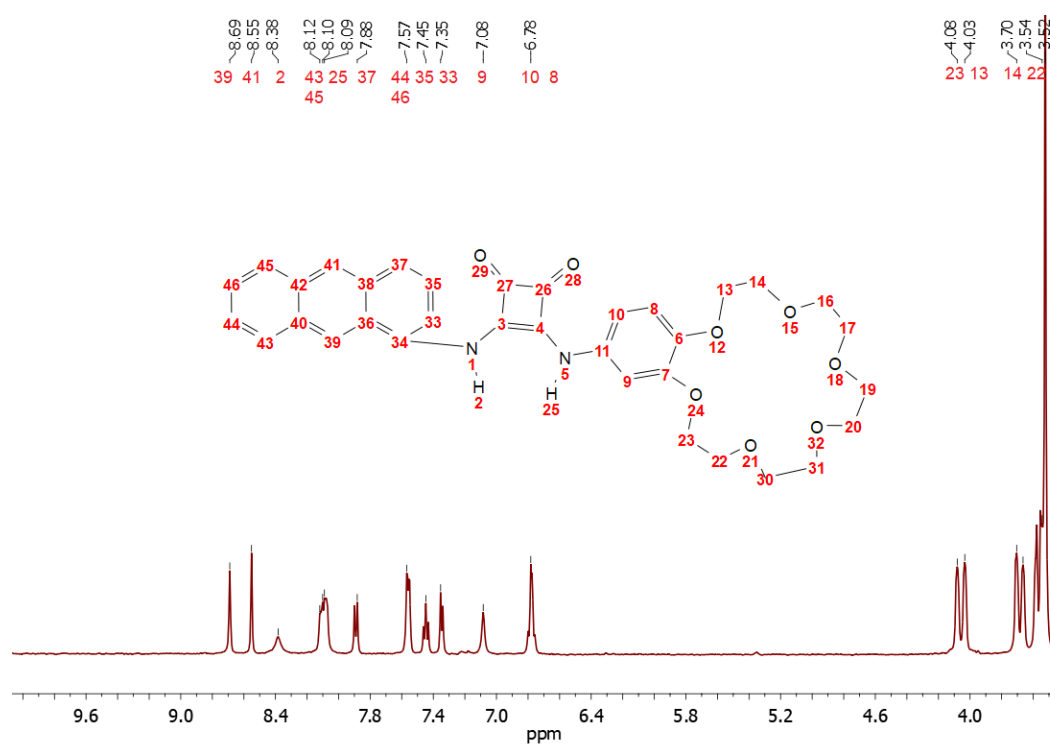

**Fig. S51.**  $^1\text{H}$  NMR spectrum of Receptor 1 (3.9 mM) in  $\text{CD}_3\text{CN}$ . Individual signals were assigned based on 2D NMR spectra.

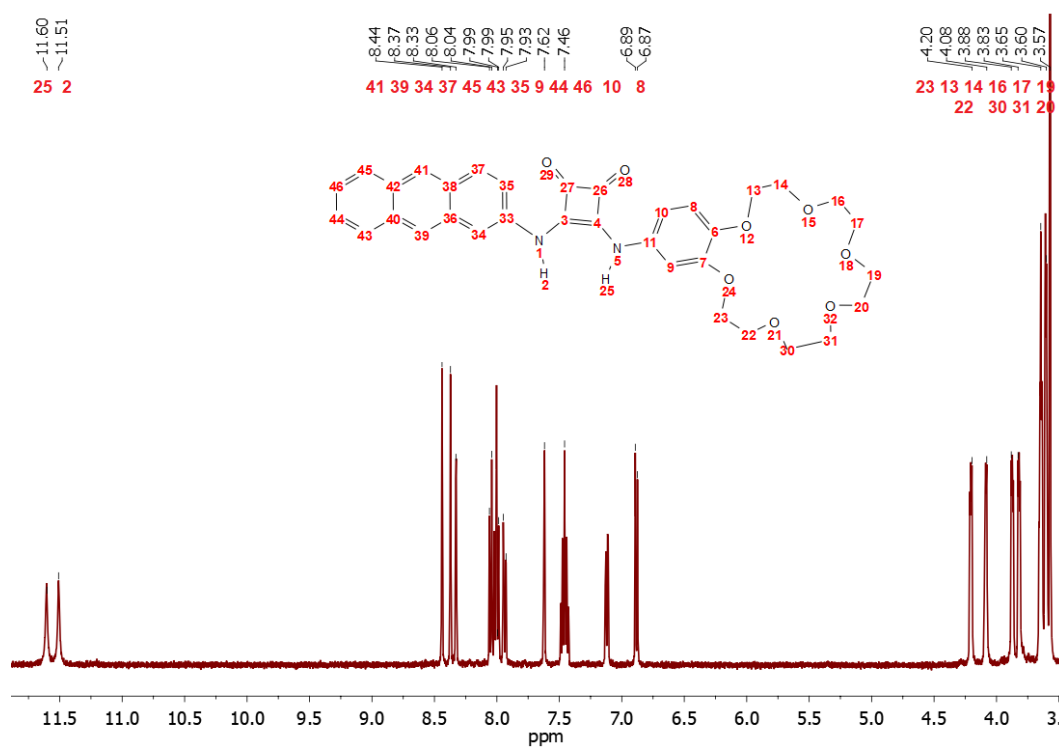

**Fig. S52.**  $^1\text{H}$  NMR spectrum of Receptor 2 (3.9 mM) in  $\text{CD}_3\text{CN}$ . Individual signals were assigned based on 2D NMR spectra.

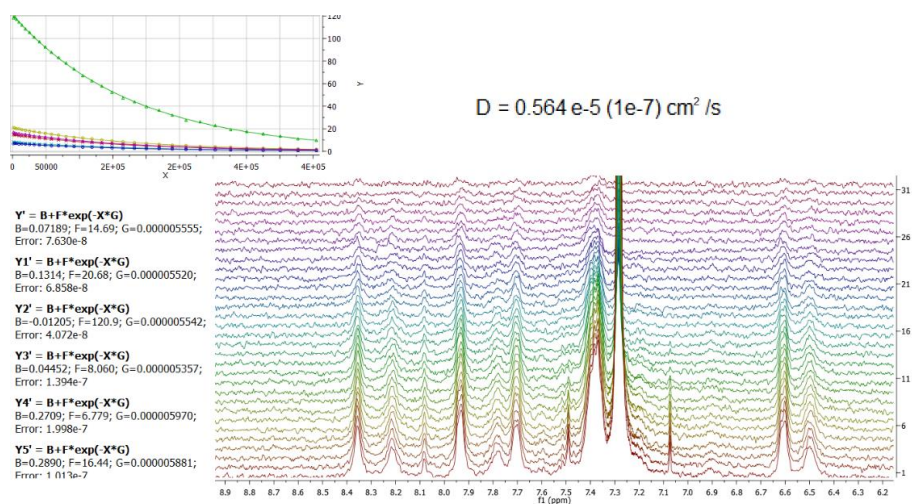

Fig. S53. DOSY NMR spectrum of receptor 1 (2.0 mM) in wet  $\text{CDCl}_3$ .

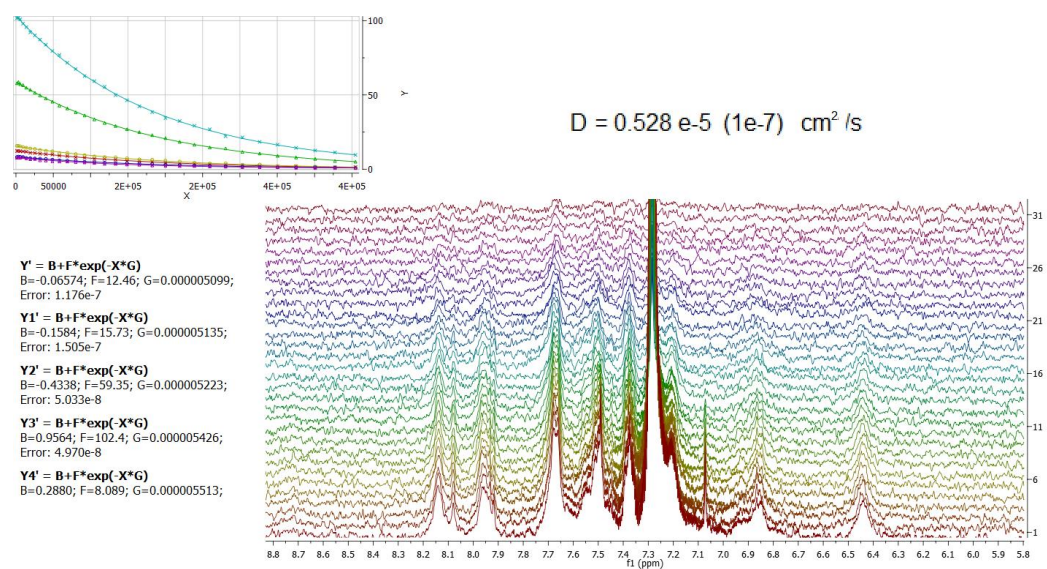

Fig. S54. DOSY NMR spectrum of receptor 1 (2.0 mM) in wet  $\text{CDCl}_3$  after extraction of aq. solution of KCl.

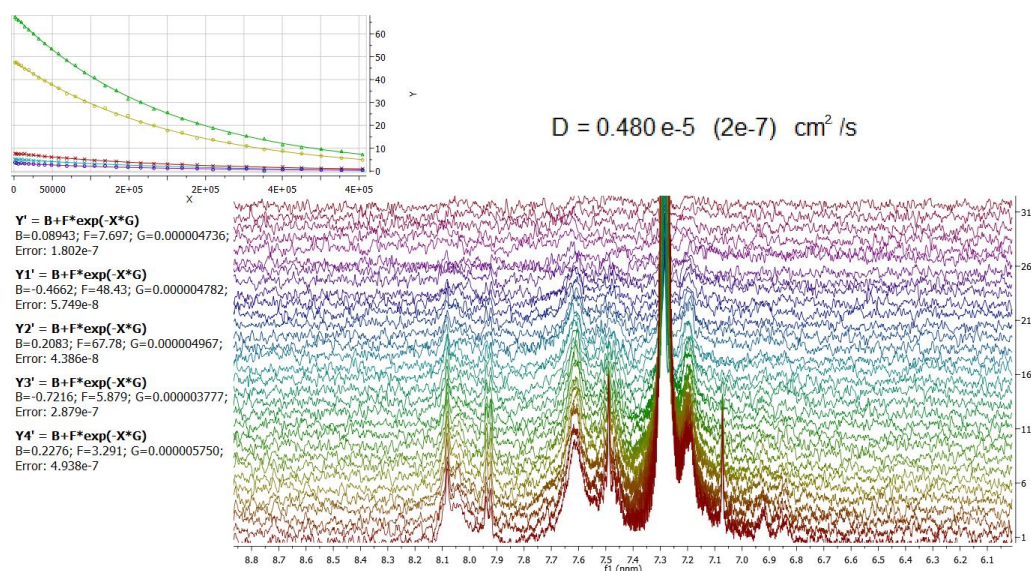

**Fig. S55.** DOSY NMR spectrum of receptor **1** (2.0 mM) in wet  $\text{CDCl}_3$  after extraction of aq. solution of  $\text{K}_2\text{SO}_4$ .

### Extraction experiments – mass spectrometry and $^1\text{H}$ NMR

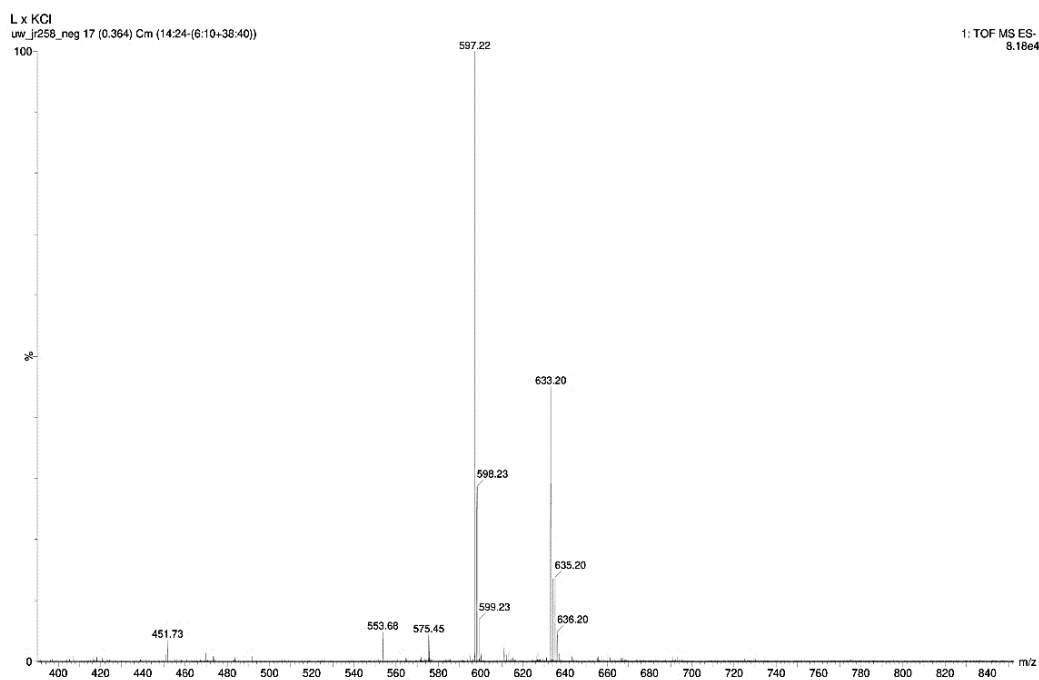

**Fig. S56.** MS of  $\text{CH}_2\text{Cl}_2$  solution of Receptor **1** after aq. KCl extraction (negative ion mode).

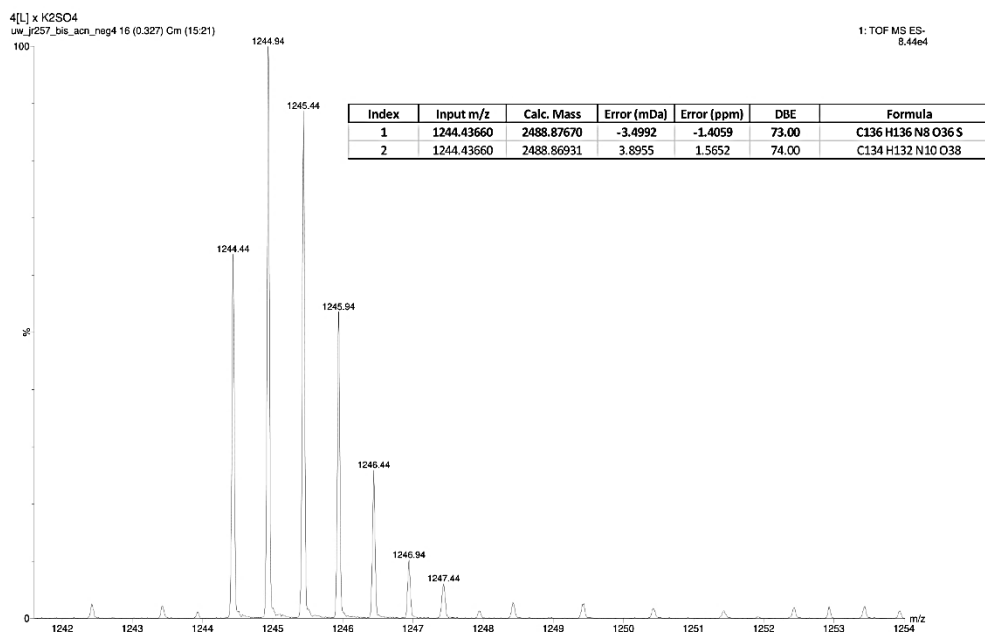

**Fig. S57.** MS of  $\text{CH}_2\text{Cl}_2$  solution of Receptor **1** after aq.  $\text{K}_2\text{SO}_4$  extraction (negative ion mode).

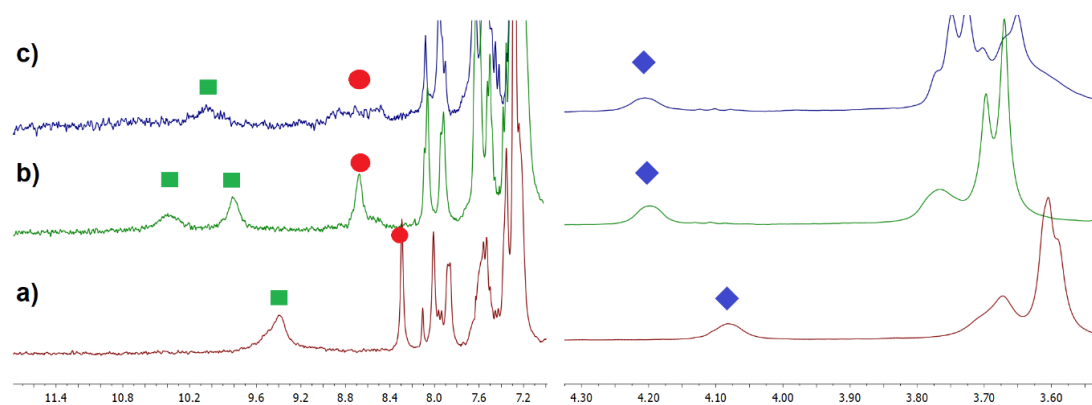

**Fig. S58.** Partial  $^1\text{H}$  NMR spectra of Receptor **1** at 3 mM (a) in wet  $\text{CDCl}_3$ ; (b) after KCl (50 mM) extraction from the aqueous phase; (c) after  $\text{K}_2\text{SO}_4$  (50 mM) extraction from the aqueous phase.

### Extraction experiments - ion chromatography

A solution of Receptor **1** in chloroform (2 ml, 20 mM or 5 mM) was intensive shaking with an aqueous mixture (no pH adjustment, pH depending on the salts used; above pH 8 there is no phase separation probably due to the receptor deprotonation. This eliminates direct use of basic salts such as carboxylates, hydrogen phosphates or phosphates) of suitable salts 5 mM each (2 ml) for 30 minutes. Then 1 mL of the aqueous phase was taken and tenfold diluted. The concentration of chloride, bromide, nitrite, nitrate, dihydrogenphosphate and sulfate anions in the aqueous phase was determined by high performance ion chromatography (HPIC).

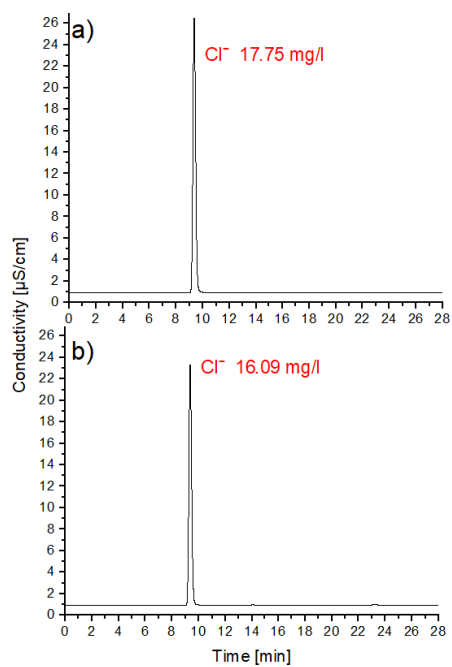

**Fig. S59.** The chromatogram was obtained during the extraction experiment after tenfold dilution (a) source phase - aqueous KCl salt (b) after extraction with 5 mM of Receptor **1** in  $\text{CHCl}_3$ .

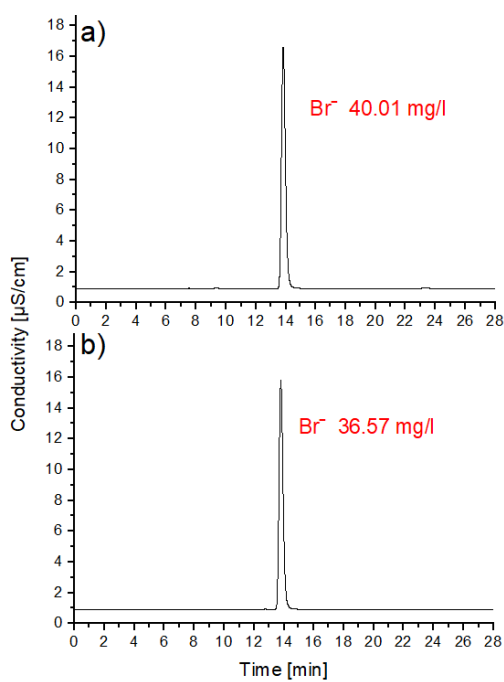

**Fig. S60.** The chromatogram was obtained during the extraction experiment after tenfold dilution (a) source phase - aqueous KBr salt (b) after extraction with 5 mM of Receptor **1** in  $\text{CHCl}_3$ .

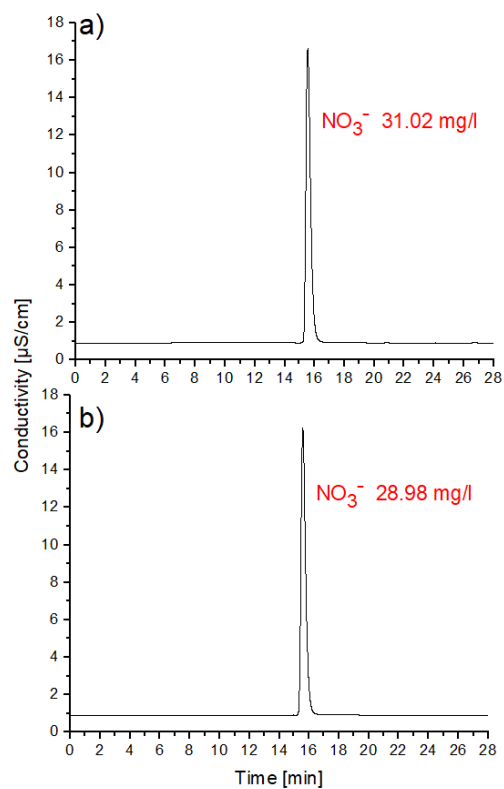

**Fig. S61.** The chromatogram was obtained during the extraction experiment after tenfold dilution (a) source phase - aqueous  $\text{KNO}_3$  salt (b) after extraction with 5 mM of Receptor **1** in  $\text{CHCl}_3$ .

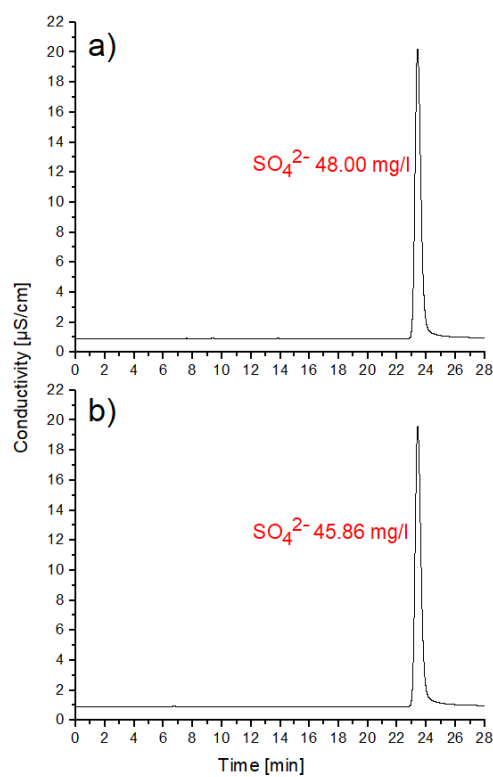

**Fig. S62.** The chromatogram was obtained during the extraction experiment after tenfold dilution (a) source phase - aqueous  $\text{K}_2\text{SO}_4$  salt (b) after extraction with 5 mM of Receptor **1** in  $\text{CHCl}_3$ .

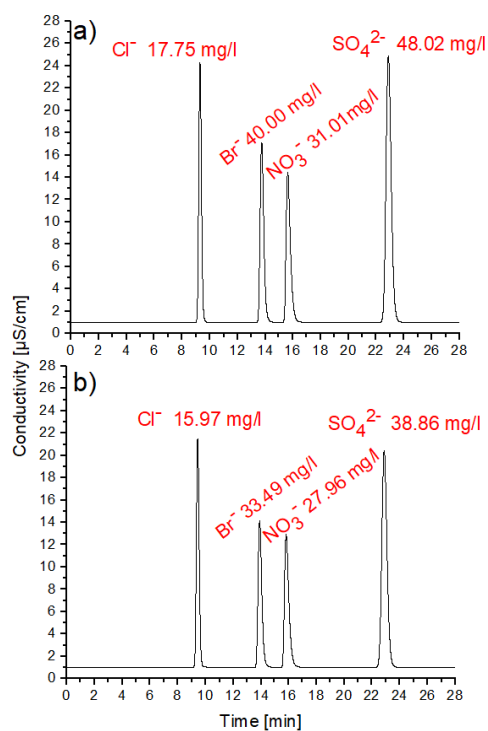

**Fig. S63.** Chromatograms obtained during extraction experiments after tenfold dilution (a) source phase – an aqueous mixture of potassium salts (b) after extraction with 20 mM of Receptor 1 in  $\text{CHCl}_3$ .

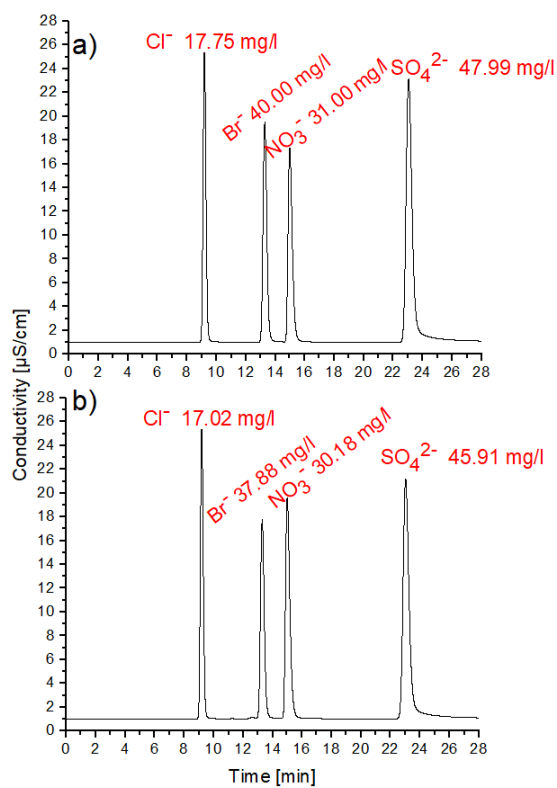

**Fig. S64.** Chromatograms obtained during extraction experiments after tenfold dilution (a) source phase – an aqueous mixture of sodium salts (b) after extraction with 20 mM of Receptor 1 in  $\text{CHCl}_3$ .

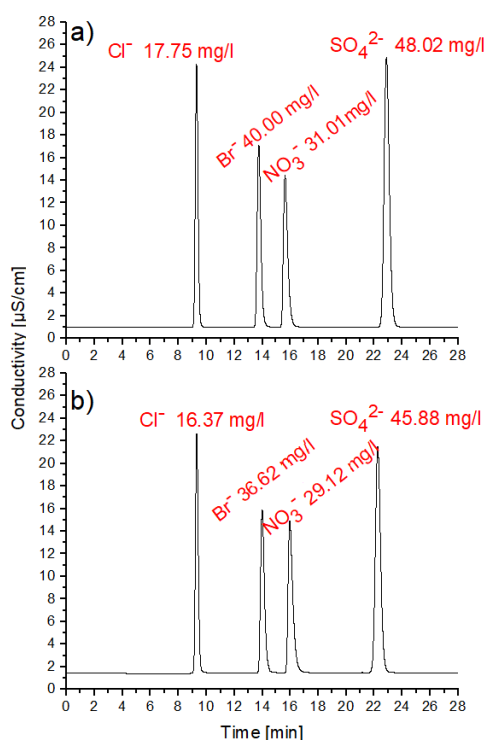

**Fig. S65.** Chromatograms obtained during extraction experiments after tenfold dilution (a) source phase – an aqueous mixture of potassium salts (b) after extraction with 5 mM of Receptor 1 in CHCl<sub>3</sub>.

### Emission spectra

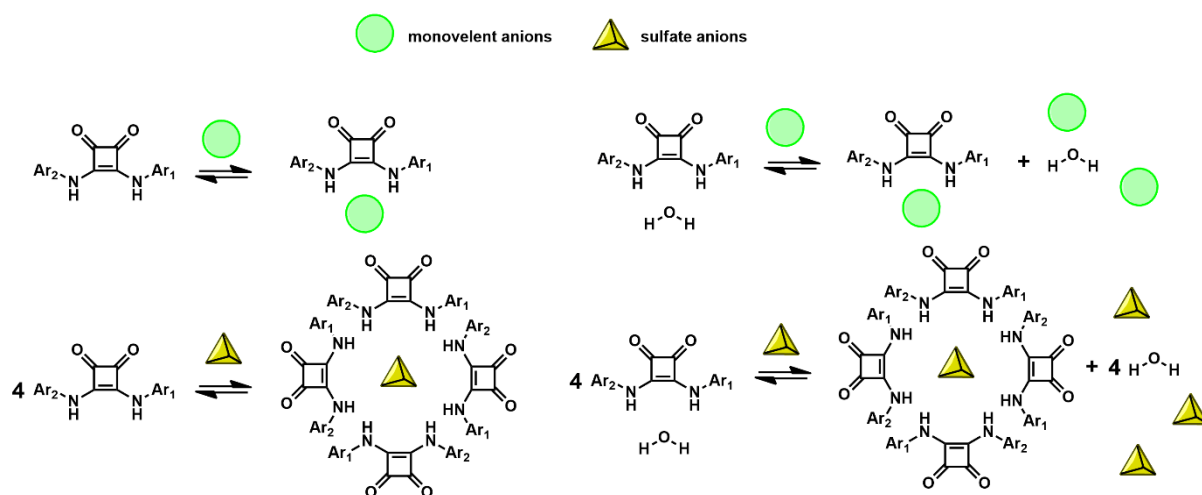

**Fig. S66.** Schematic illustration of the difference in binding mode by receptors.

Fluorescence emission spectra were measured on a Hitachi F-7100 Fluorescence Spectrophotometer. Solution of Receptor 1 and 2 ( $c=1.0 \times 10^{-4}$  M) in CH<sub>3</sub>CN or CHCl<sub>3</sub> were titration with small aliquots of

TBAX solution containing **1** or **2** at the same concentration as in cuvette. Successive scans were performed measuring fluorescence ( $\lambda_{\text{ex}} = 327$  nm for **1** and 345 nm for **2**) emission between 300 and 700 nm.

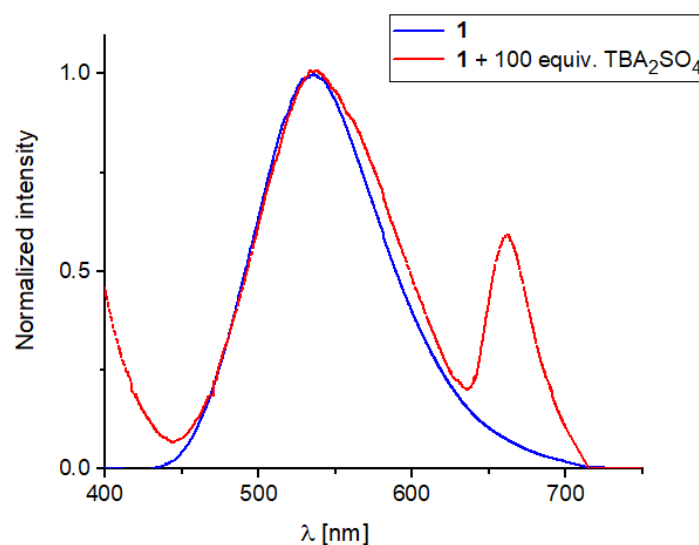

**Fig. S67.** Normalized spectra of Receptor **1** ( $1.0 \times 10^{-4}\text{M}$ ) in the absence and the presence of an excess of  $\text{TBA}_2\text{SO}_4$  (excitation at 327 nm) in dry  $\text{CH}_3\text{CN}$ .

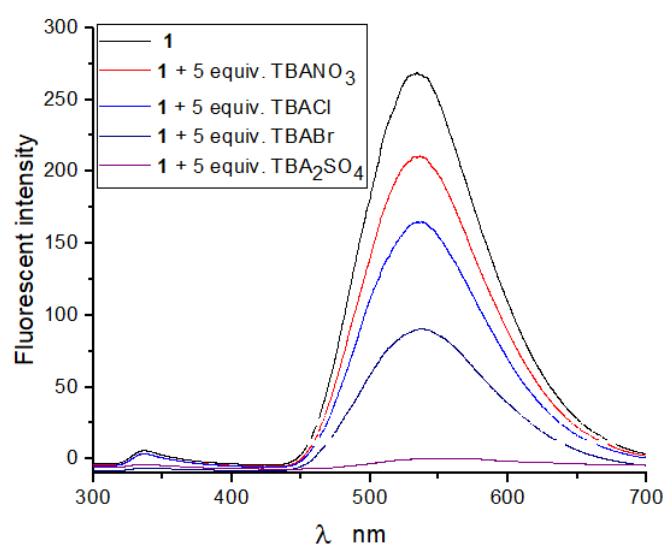

**Fig. S68.** Emission spectra of Receptor **1** ( $4.0 \times 10^{-4}\text{M}$ ) and upon addition of TBA salts (excitation at 327 nm) in dry  $\text{CH}_3\text{CN}$ .

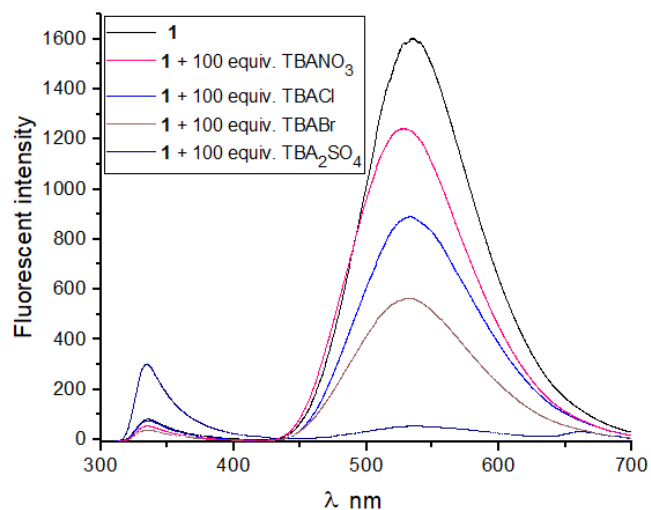

**Fig. S69.** Emission spectra of Receptor **1** ( $1.0 \times 10^{-4}\text{M}$ ) and upon addition of TBA salts (excitation at 327 nm) in dry  $\text{CH}_3\text{CN}$ .

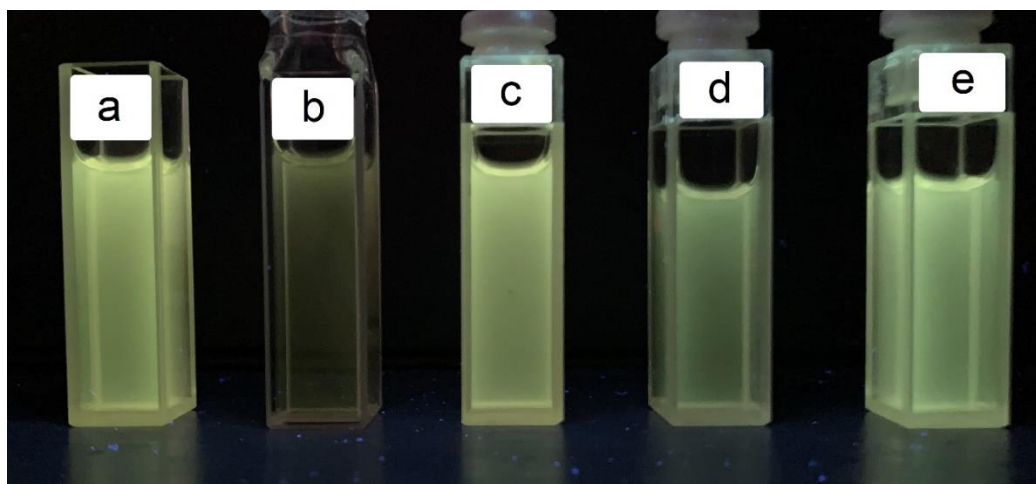

**Fig. S70.** Changes of fluorescence intensity under UV light,  $\lambda = 254 \text{ nm}$  : a - Receptor **1** ( $1.0 \times 10^{-4}\text{M}$ ) in dry  $\text{CH}_3\text{CN}$ , b - upon the addition of  $\text{TBA}_2\text{SO}_4$  (100 equiv.), c - upon the addition of  $\text{TBACl}$  (100 equiv.), d - upon the addition of  $\text{TBABr}$  (100 equiv.), e - upon the addition of  $\text{TBANO}_3$  (100 equiv.).

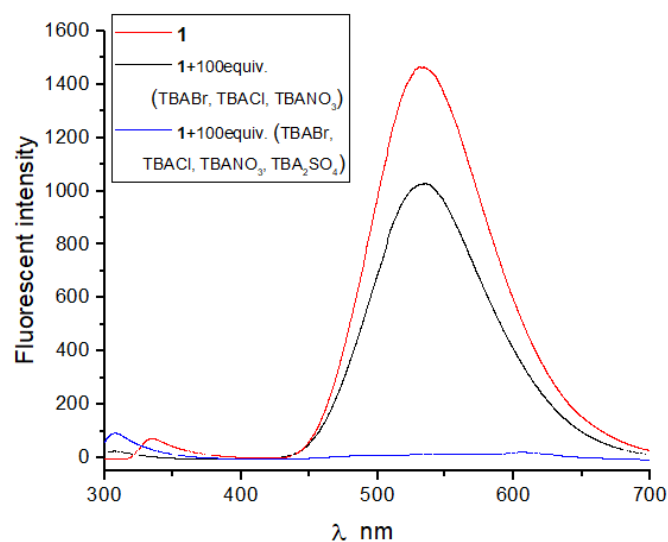

**Fig. S71.** Emission spectra of Receptor **1** ( $1.0 \times 10^{-4}$ M) and upon addition of TBA salts (excitation at 327 nm) in dry  $\text{CH}_3\text{CN}$ .

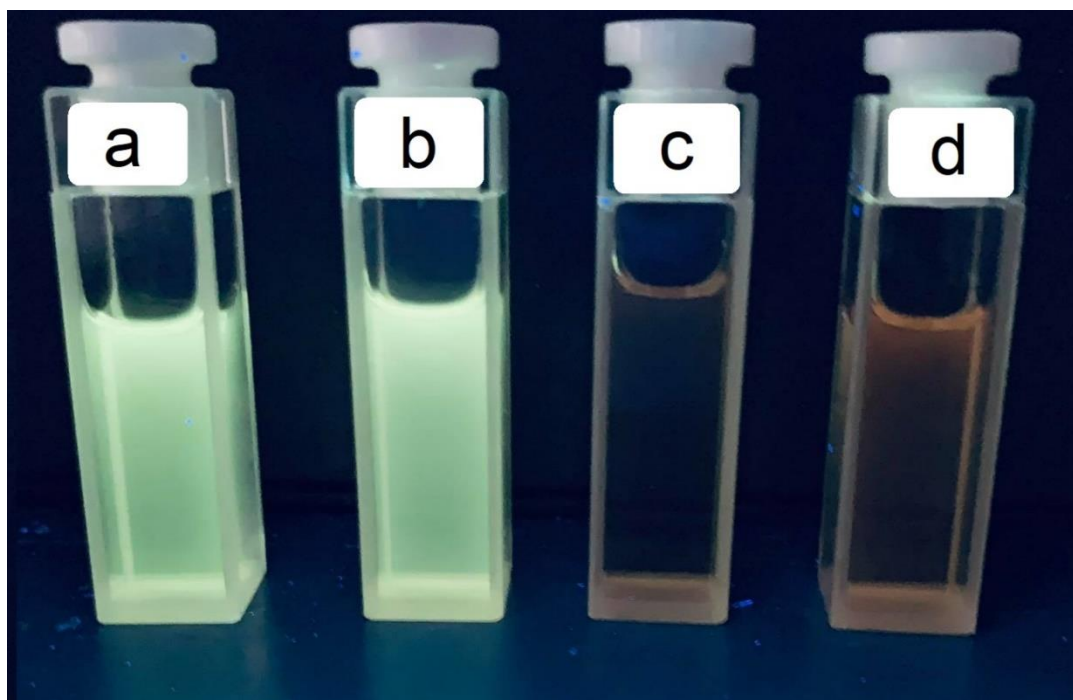

**Fig. S72.** Changes observed fluorescence intensity under UV light,  $\lambda = 254 \text{ nm}$  : a - Receptor **1** ( $1.0 \times 10^{-4}$ M) in dry  $\text{CH}_3\text{CN}$ , b - upon the addition of 100 equiv. of TBABr, TBACl,  $\text{TBANO}_3$  (33.3 equiv. each salt), c - upon the addition of 100 equiv. of TBABr, TBACl,  $\text{TBANO}_3$ ,  $\text{TBA}_2\text{SO}_4$  (25 equiv. each salt), d - upon the addition of 100 equiv.  $\text{TBA}_2\text{SO}_4$ .

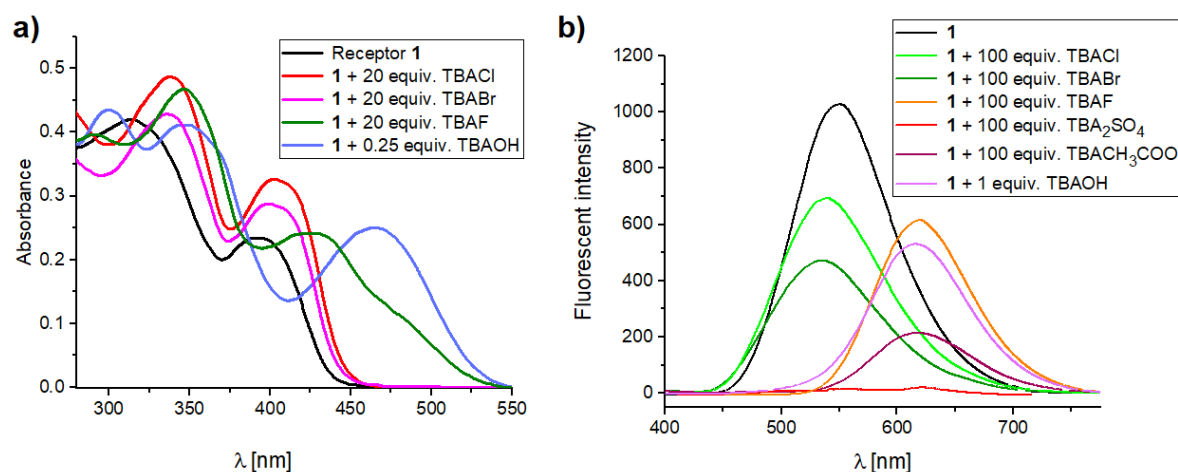

**Fig. S73.** UV-vis spectra of Receptor **1** ( $2.0 \times 10^{-5}$  M) (a) and Emission spectra (b) of Receptor **1** ( $1.0 \times 10^{-4}$  M) and upon addition of TBA salts (excitation at 327 nm) in dry CH<sub>3</sub>CN.

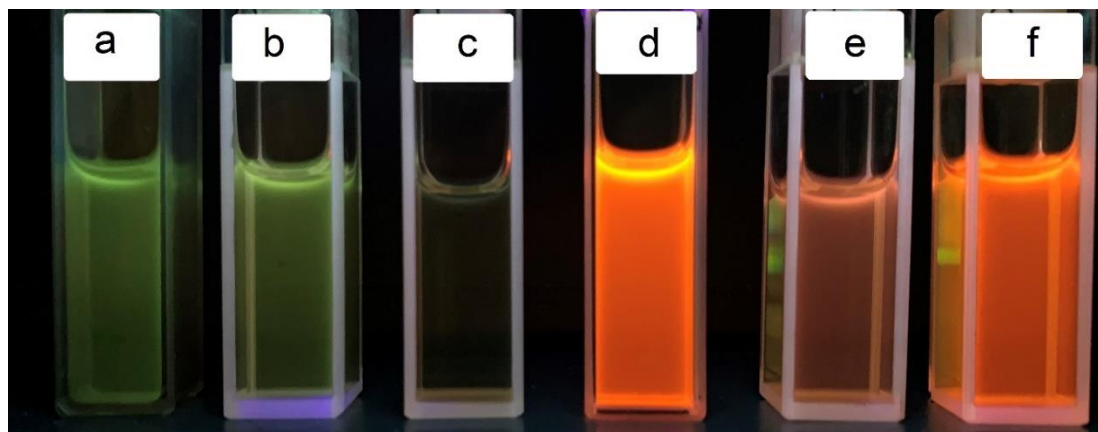

**Fig. S74.** Changes observed fluorescence intensity under UV light,  $\lambda = 254$  nm : a - Receptor **1** ( $1.0 \times 10^{-4}$  M) in dry CH<sub>3</sub>CN, b - upon the addition of 100 equiv. of TBACl, c - upon the addition of 100 equiv. of TBA<sub>2</sub>SO<sub>4</sub>, d - upon the addition of 100 equiv. TBAF, e - upon the addition of 100 equiv. of TBACH<sub>3</sub>COO, f - upon the addition of 1 equiv. of TBAOH.

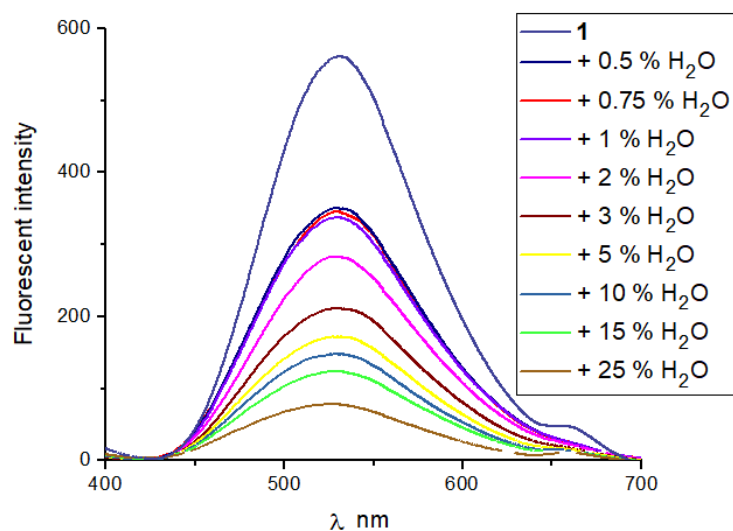

**Fig. S75.** Emission spectra of Receptor **1** ( $1.5 \times 10^{-4}\text{M}$ ) and upon addition of deionized water (excitation at 327 nm) in  $\text{CH}_3\text{CN}$ .

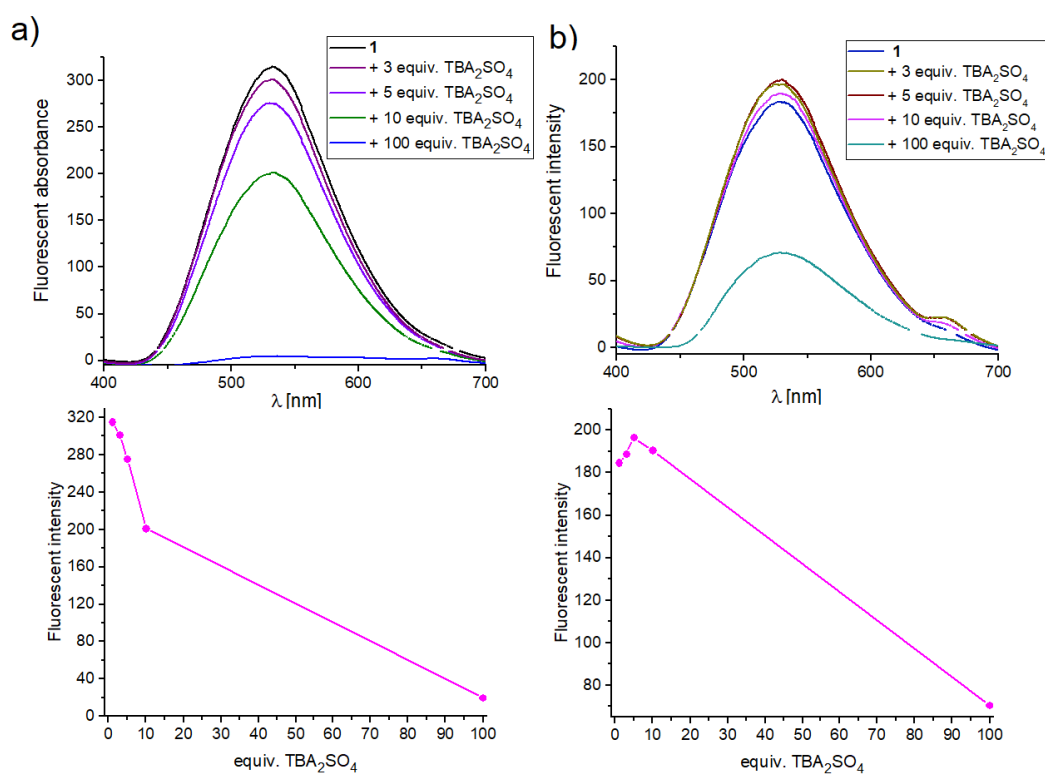

**Fig. S76.** Comparison of emission spectra of Receptor **1** ( $2.4 \times 10^{-4}\text{M}$ ) upon addition of  $\text{TBA}_2\text{SO}_4$  (excitation at 327 nm) in dry  $\text{CH}_3\text{CN}$  (a) and in 1% of  $\text{H}_2\text{O}$  in  $\text{CH}_3\text{CN}$  (b).

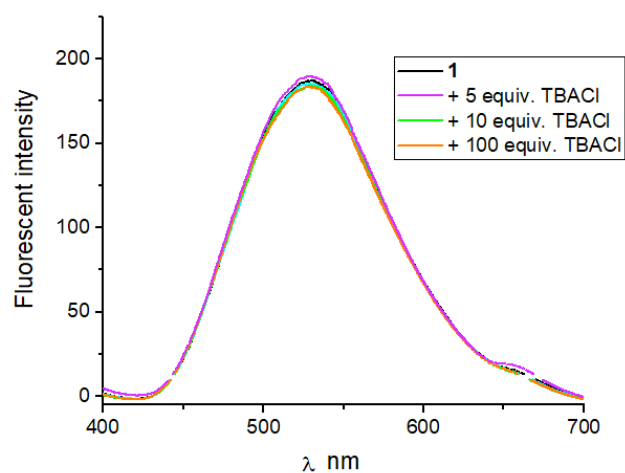

**Fig. S77.** Emission spectra of Receptor **1** ( $2.4 \times 10^{-4}\text{M}$ ) and upon addition of TBACl (excitation at 327 nm) in 1% of  $\text{H}_2\text{O}$  in  $\text{CH}_3\text{CN}$ .

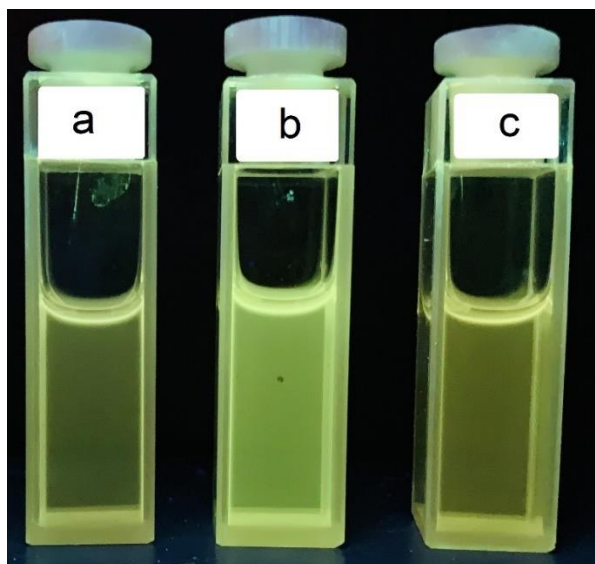

**Fig. S78.** Changes observed fluorescence intensity under UV light,  $\lambda = 254 \text{ nm}$  : a - **1** ( $2.4 \times 10^{-4}\text{M}$ ) in  $\text{CH}_3\text{CN}$  upon the addition of 1 %  $\text{H}_2\text{O}$ , b - Receptor **1** ( $2.4 \times 10^{-4}\text{M}$ ) in 1% of  $\text{H}_2\text{O}$  in  $\text{CH}_3\text{CN}$  upon the addition of and 5 equiv.  $\text{TBA}_2\text{SO}_4$ , c - Receptor **1** ( $2.4 \times 10^{-4}\text{M}$ ) in 1% of  $\text{H}_2\text{O}$  in  $\text{CH}_3\text{CN}$  upon the addition of and 5 equiv. TBACl.

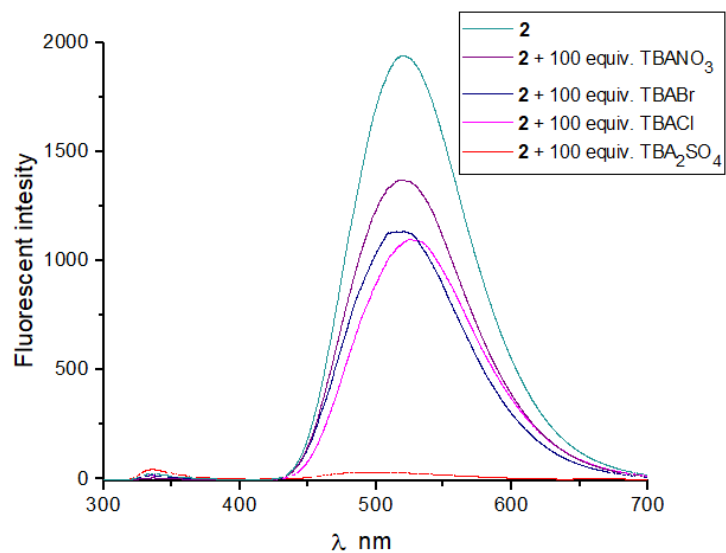

**Fig. S79.** Emission spectra of Receptor **2** ( $1.0 \times 10^{-4}\text{M}$ ) and upon addition of TBA salts (excitation at 345 nm) in  $\text{CH}_3\text{CN}$ .

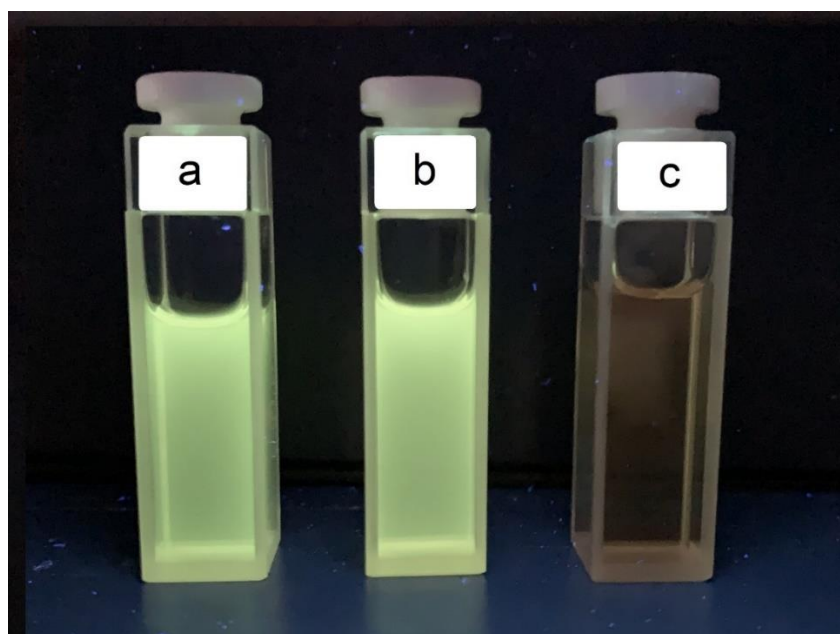

**Fig. S80.** Changes of fluorescence intensity under UV light,  $\lambda = 254 \text{ nm}$ : a - Receptor **2** ( $1.0 \times 10^{-4}\text{M}$ ) in dry  $\text{CH}_3\text{CN}$ , b - upon the addition of TBACl (100 equiv.), c - upon the addition of  $\text{TBA}_2\text{SO}_4$  (100 equiv.).

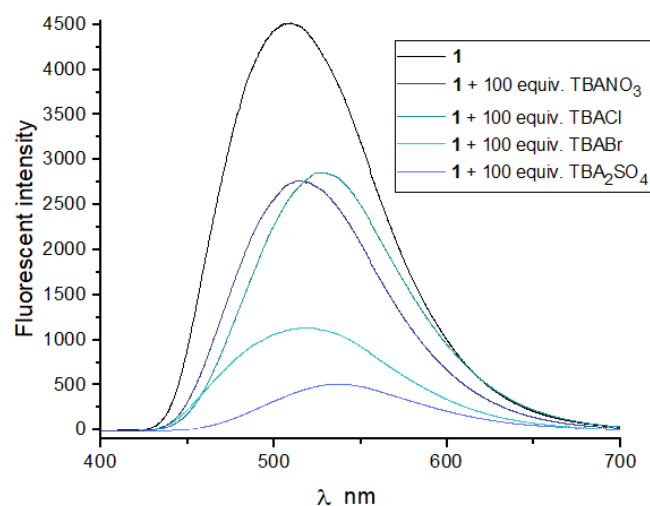

**Fig. S81.** Emission spectra of Receptor **1** ( $1.0 \times 10^{-4}$ M) and upon addition of TBA salts (excitation at 327 nm) in dry  $\text{CHCl}_3$ .

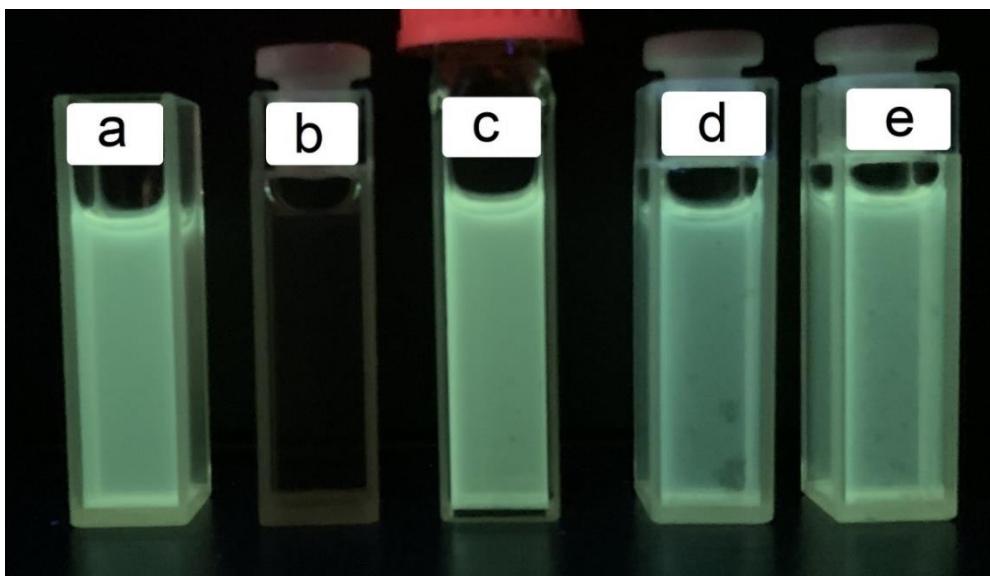

**Fig. S82.** Changes observed fluorescence intensity under UV light,  $\lambda = 254$  nm: a - Receptor **1** (1.0 mM) in dry  $\text{CHCl}_3$ , b - upon the addition of  $\text{TBA}_2\text{SO}_4$  (100 equiv.), c - upon the addition of  $\text{TBACl}$  (100 equiv.), d - upon the addition of  $\text{TBABr}$  (100 equiv.), e - upon the addition of  $\text{TBANO}_3$  (100 equiv.).

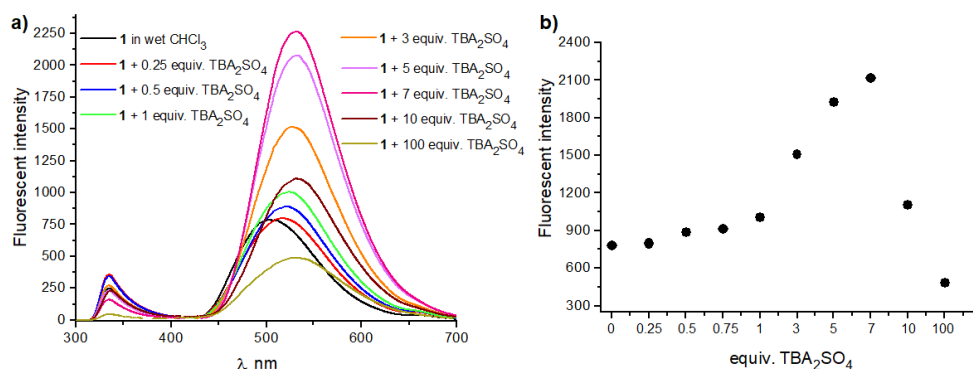

**Fig. S83.** a) Emission spectra of Receptor **1** ( $1.0 \times 10^{-4}$  M) and upon addition of TBA<sub>2</sub>SO<sub>4</sub> (excitation at 327 nm) in wet CHCl<sub>3</sub>. b) Changes in fluorescent intensity for Receptor **1** ( $1.0 \times 10^{-4}$  M) and upon addition of TBA<sub>2</sub>SO<sub>4</sub>.

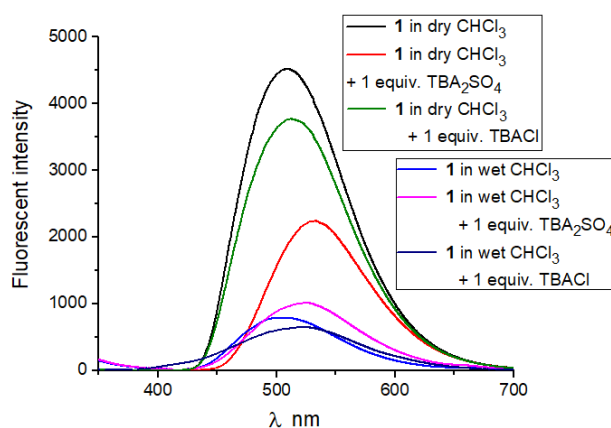

**Fig. S84.** Emission spectra of Receptor **1** ( $1.0 \times 10^{-4}$  M) and upon addition of TBA salts (excitation at 327 nm) in dry and wet CHCl<sub>3</sub>.

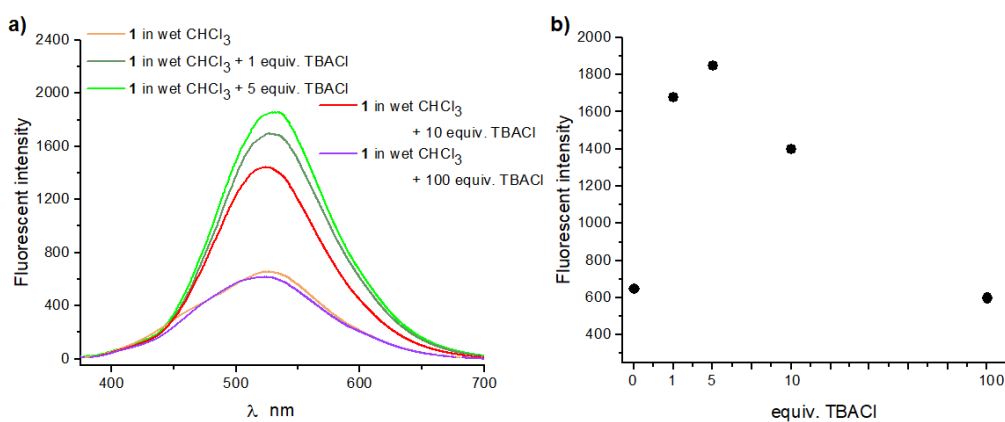

**Fig. S85.** a) Emission spectra of Receptor **1** ( $1.0 \times 10^{-4}$  M) and upon addition of TBACl (excitation at 327 nm) in wet CHCl<sub>3</sub>. b) Changes in fluorescent intensity for Receptor **1** ( $1.0 \times 10^{-4}$  M) and upon addition of TBACl.

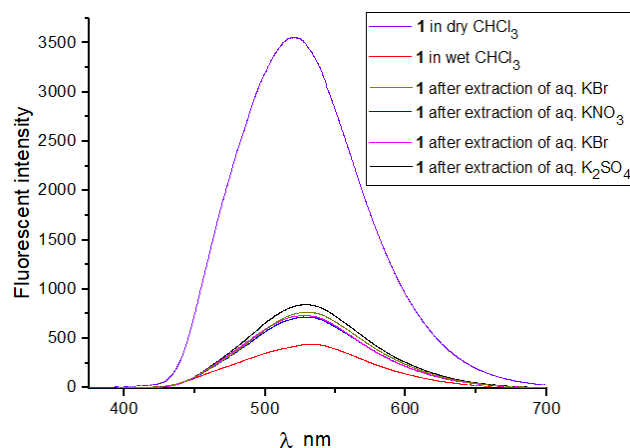

**Fig. S86.** Emission spectra of Receptor **1** ( $1.0 \times 10^{-4}$  M) and after extraction with aqueous potassium salts 5 mM (excitation at 327 nm) in  $\text{CHCl}_3$ .

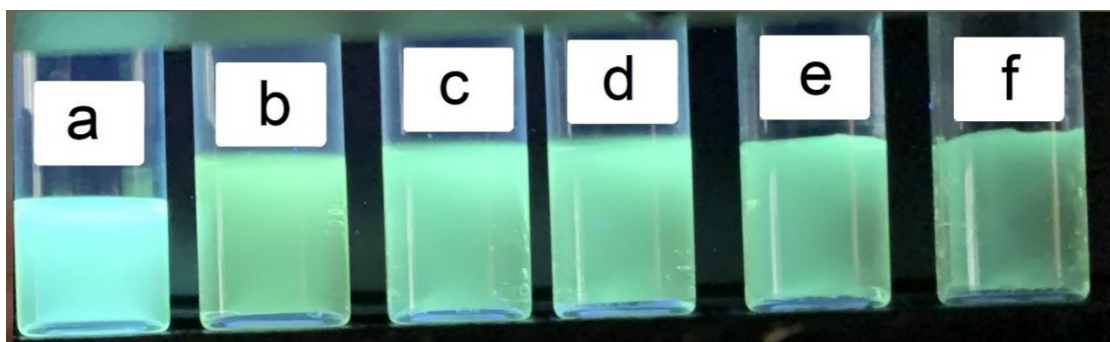

**Fig. S87.** Changes observed fluorescence intensity under UV light,  $\lambda = 254$  nm: a - Receptor **1** (1.0 mM) in dry  $\text{CHCl}_3$ , b - Receptor **1** (1.0 mM) in wet  $\text{CHCl}_3$ , c - after extraction of aqueous solution of  $\text{K}_2\text{SO}_4$  (5 mM), d - after extraction of aqueous solution of  $\text{KCl}$  (5 mM), e - after extraction of aqueous solution of  $\text{KBr}$  (5 mM), f - after extraction of aqueous solution of  $\text{KNO}_3$  (5 mM).

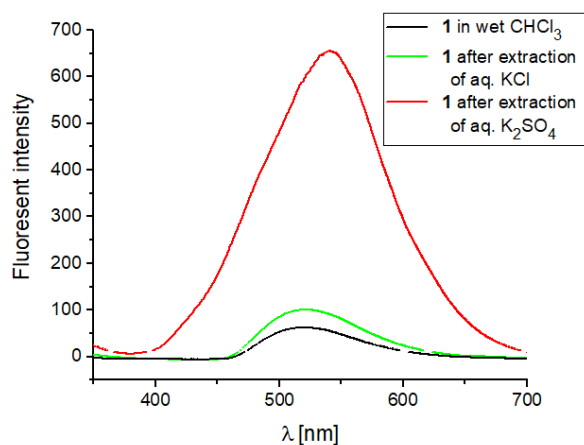

**Fig. S88.** Emission spectra of Receptor 1 ( $2.3 \times 10^{-3}$  M) and after extraction with aqueous potassium salts 50 mM (excitation at 327 nm) in  $\text{CHCl}_3$ .

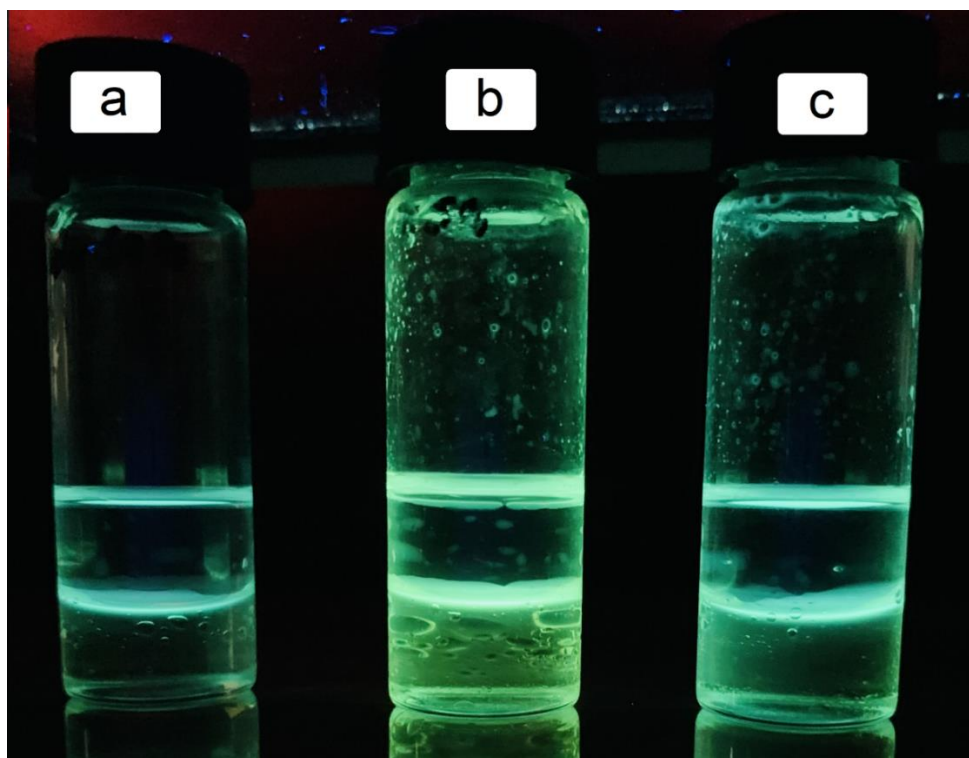

**Fig. S89.** Changes observed fluorescence intensity under UV light,  $\lambda = 254$  nm: a - Receptor 1 (2.3 mM) in wet  $\text{CHCl}_3$ , b - after extraction of aqueous solution of  $\text{K}_2\text{SO}_4$  (50 mM), c - after extraction of a aqueous solution of KCl (50mM).

### Crystal data

**1 + KCl/NaCl.** The X-ray measurement of **1** + **KCl/NaCl** was performed at 100.0(5) K on a Bruker D8 Venture PhotonII diffractometer equipped with a TRIUMPH monochromator and a MoK $\alpha$  fine focus sealed tube ( $\lambda = 0.71073$  Å). A total of 2130 frames were collected with the Bruker APEX3 program [S2]. The frames were integrated with the Bruker SAINT software package [S3] using a narrow-frame algorithm. The integration of the data using a monoclinic unit cell yielded a total of 60775 reflections to a maximum  $\theta$  angle of  $25.50^\circ$  (0.83 Å resolution), of which 6564 were independent (average redundancy 9.259, completeness = 99.9%,  $R_{\text{int}} = 4.75\%$ ,  $R_{\text{sig}} = 2.71\%$ ) and 5491 (83.65%) were greater than  $2\sigma(F^2)$ . The final cell constants of  $a = 13.0006(19)$  Å,  $b = 30.149(4)$  Å,  $c = 9.0389(13)$  Å,  $\beta = 93.713(6)^\circ$ ,  $V = 3535.4(9)$  Å<sup>3</sup>, are based upon the refinement of the XYZ-centroids of 9843 reflections above  $20\sigma(I)$  with  $4.714^\circ < 2\theta < 51.22^\circ$ . Data were corrected for absorption effects using the Multi-Scan method

(SADABS).<sup>S4</sup> The ratio of minimum to the maximum apparent transmission was 0.944. The calculated minimum and maximum transmission coefficients (based on crystal size) are 0.877 and 0.990.

The structure was solved and refined using SHELXTL Software Package[S5, S6] using the space group  $P2_1/c$ , with  $Z = 2$  for the formula unit,  $C_{71.75}H_{79.26}Cl_2K_{1.36}Na_4Na_{0.64}O_{17.88}S_{1.88}$  corresponding to  $2 \times C_{34}H_{34}N_2O_8 + 1.36 \times KCl + 0.64 \times NaCl + 1.88 \times DMSO$ . The final anisotropic full-matrix least-squares refinement on  $F^2$  with 470 variables converged at  $R1 = 3.76\%$ , for the observed data and  $wR2 = 7.84\%$  for all data. The goodness-of-fit was 1.093. The largest peak in the final difference electron density synthesis was  $0.317 \text{ e}/\text{\AA}^3$  and the largest hole was  $-0.200 \text{ e}/\text{\AA}^3$  with an RMS deviation of  $0.044 \text{ e}/\text{\AA}^3$ . On the basis of the final model, the calculated density was  $1.393 \text{ g}/\text{cm}^3$  and  $F(000)$ , 1555 e<sup>-</sup>.

The structure in the asymmetric part contains one molecule of the receptor **1**, non-stoichiometric amount of  $K^+$  and  $Na^+$  ions located in close proximity in the crown ether moiety with the refined occupancy of  $K^+$  and  $Na^+$  yielding 0.681(6) and 0.319(6) respectively, and non-stoichiometric amount of DMSO solvent molecule with refined occupancy of 0.938(2). Due to the mixed site structure, the position of  $Cl^-$  ions is slightly different depending on the presence of the cation. For both, the cations and anions equal atomic displacement parameters were used. All major component non-H atoms including  $Na^+$  and  $Cl^-$  moiety located at two different positions were refined anisotropically. Most hydrogen atoms were placed in calculated positions and were refined within the riding model. Temperature factors of these hydrogen atoms were not refined and were set to be either 1.2 or 1.5 times larger than  $U_{eq}$  of the corresponding heavy atom. Positions of two hydrogen atoms engaged in hydrogen bonds (all N-H groups) were freely refined including their isotropic temperature parameters. The atomic scattering factors were taken from the International Tables [6]. Molecular graphics were prepared using the program Mercury 4.1 [S8]. The details concerning crystal data and refinement parameters for **1** +  $KCl/NaCl$  are collected in Table S2. Thermal ellipsoids parameters for **1** +  $KCl/NaCl$  are presented at 50% probability level in Figure S90 a). **1** +  $NaBr$ . The X-ray measurement of **1** +  $NaBr$  was performed at 100.0(5) K on a Bruker D8 Venture PhotonII diffractometer equipped with a TRIUMPH monochromator and a  $MoK\alpha$  fine focus sealed tube ( $\lambda = 0.71073 \text{ \AA}$ ). A total of 2130 frames were collected with the Bruker APEX3 program.<sup>S2</sup> The crystal is composed of two components that were used during data reduction. The frames were integrated with the Bruker SAINT software package<sup>S4</sup> using a narrow-frame algorithm. The integration of the data using a monoclinic unit cell yielded a total of 110006 reflections to a maximum  $\theta$  angle of  $25.71^\circ$  ( $0.819 \text{ \AA}$  resolution) with completeness = 100.0%,  $R_{int} = 8.10\%$ ,  $R_{sig} = 2.59\%$ . For the structure refinement, a maximum  $\theta$  angle was cut down to  $25.50^\circ$  giving 5786 independent reflections with 5062 (87.49%) greater than  $2\sigma(F^2)$ . The final cell constants of  $a = 12.3418(19) \text{ \AA}$ ,  $b = 15.454(3) \text{ \AA}$ ,  $c = 16.593(3) \text{ \AA}$ ,  $\beta = 100.756(6)^\circ$ ,  $V = 3109.2(9) \text{ \AA}^3$ , are based upon the refinement of the XYZ-centroids of 9830 reflections above  $20 \sigma(I)$  with  $4.620^\circ < 2\theta < 51.18^\circ$ . Data were corrected for absorption effects using the Multi-Scan

method (TWINABS).<sup>59</sup> The ratio of minimum to the maximum apparent transmission was 0.733. The calculated minimum and maximum transmission coefficients (based on crystal size) are 0.687 and 0.921. The measured crystal is composed of two slightly rotated domains with partial overlap of the reflections. Data integration was based on these two domains resulting in final data merged in HKLF4 format. The calculated domains fraction ratio yields 0.666:0.334. The structure was solved and refined using SHELXTL Software Package<sup>55, 56</sup> using the space group  $P2_1/c$ , with  $Z = 4$  for the formula unit,  $C_{34}H_{34}BrN_2NaO_8$  corresponding to  $C_{34}H_{34}N_2O_8 + NaBr$ . The final anisotropic full-matrix least-squares refinement on  $F^2$  with 481 variables converged at  $R1 = 4.52\%$ , for the observed data and  $wR2 = 11.49\%$  for all data. The goodness-of-fit was 1.076. The largest peak in the final difference electron density synthesis was  $0.652 \text{ e}/\text{\AA}^3$  and the largest hole was  $-0.469 \text{ e}/\text{\AA}^3$  with an RMS deviation of  $0.068 \text{ e}/\text{\AA}^3$ . On the basis of the final model, the calculated density was  $1.499 \text{ g}/\text{cm}^3$  and  $F(000)$ , 1448 e.

The structure contains in the asymmetric part a single molecule of the receptor **1** and NaBr moiety as ionic pair. The structure is disordered with two alternative positions of  $Na^+$  and  $Br^-$  ions including also alternative positions of an aliphatic chain of the crown ether moiety in the receptor. The refined occupancy ratio of all disordered over two positions atoms yields 0.748(8):0.252(8). To preserve reasonable geometry of the lower occupancy aliphatic chain the similarity restraints were used. Due to the close proximity of the disordered fragments, a number of restraints for the atomic displacement parameters were also used. All major component non-H atoms including  $Br^-$  moiety located at two different positions were refined anisotropically. Most hydrogen atoms were placed in calculated positions and were refined within the riding model. Temperature factors of these hydrogen atoms were not refined and were set to be either 1.2 or 1.5 times larger than  $U_{eq}$  of the corresponding heavy atom. Positions of two hydrogen atoms engaged in hydrogen bonds (all N-H groups) were freely refined including their isotropic temperature parameters. The atomic scattering factors were taken from the International Tables [S7]. Molecular graphics were prepared using the program Mercury 4.1 [S8]. The details concerning crystal data and refinement parameters for **1** + NaBr are collected in Table S2. Thermal ellipsoids parameters for **1** + NaBr are presented at 50% probability level in Figure S90 b).

Table S2. Crystal data and refinement parameters for **1** + KCl/NaCl and **1** + NaBr.

| Identification code                | <b>1</b> + KCl/NaCl                                                                                                                                                           | <b>1</b> + NaBr*                                                             |
|------------------------------------|-------------------------------------------------------------------------------------------------------------------------------------------------------------------------------|------------------------------------------------------------------------------|
| <b>Chemical formula</b>            | $C_{71.75}H_{79.26}Cl_2K_{1.36}N_4Na_{0.64}O_{17.88}S_{1.88}$<br>corresponding to: $2 \times C_{34}H_{34}N_2O_8 +$<br>$1.36 \times KCl + 0.64 \times NaCl + 1.88 \times DMSO$ | $C_{34}H_{34}BrN_2NaO_8$<br>corresponding to:<br>$C_{34}H_{34}N_2O_8 + NaBr$ |
| $M_r/\text{g}\cdot\text{mol}^{-1}$ | 1482.55                                                                                                                                                                       | 701.53                                                                       |
| $T/\text{K}$                       | 100.0(5)                                                                                                                                                                      | 100.0(5)                                                                     |
| $\lambda/\text{\AA}$               | 0.71073                                                                                                                                                                       | 0.71073                                                                      |

|                                          |                                                                                                                           |                                                                                                                           |
|------------------------------------------|---------------------------------------------------------------------------------------------------------------------------|---------------------------------------------------------------------------------------------------------------------------|
| <b>Crystal size</b>                      | 0.032×0.080×0.441                                                                                                         | 0.060×0.270×0.29                                                                                                          |
| <b>Space group</b>                       | $P2_1/c$                                                                                                                  | $P2_1/c$                                                                                                                  |
| <b>Unit cell dimensions</b>              | $a = 13.0006(19) \text{ \AA}$<br>$b = 30.149(4) \text{ \AA}$<br>$c = 9.0389(13) \text{ \AA}$<br>$\beta = 93.713(6)^\circ$ | $a = 12.3418(19) \text{ \AA}$<br>$b = 15.454(3) \text{ \AA}$<br>$c = 16.593(3) \text{ \AA}$<br>$\beta = 100.756(6)^\circ$ |
| $V/\text{\AA}^3, Z$                      | 3535.4(9), 2                                                                                                              | 3109.2(9), 4                                                                                                              |
| $D_x/\text{g}\cdot\text{cm}^{-3}$        | 1.393                                                                                                                     | 1.499                                                                                                                     |
| $\mu/\text{mm}^{-1}$                     | 0.305                                                                                                                     | 1.393                                                                                                                     |
| $F(000)$                                 | 1555                                                                                                                      | 1448                                                                                                                      |
| $\theta_{\min}, \theta_{\max}$           | $2.36^\circ, 25.50^\circ$                                                                                                 | $2.13^\circ, 25.50^\circ$                                                                                                 |
| <b>Index ranges</b>                      | $-15 \leq h \leq 15$<br>$-36 \leq k \leq 36$<br>$-10 \leq l \leq 10$                                                      | $-14 \leq h \leq 14$<br>$0 \leq k \leq 18$<br>$0 \leq l \leq 20$                                                          |
| <b>Reflections collected/Independent</b> | 60775/ 6564<br>$R_{\text{int}}=0.0475$                                                                                    | 110006**/ 5786<br>$R_{\text{int}}=0.0810^{**}$                                                                            |
| <b>Data completeness</b>                 | 99.9%                                                                                                                     | 100.0%                                                                                                                    |
| <b>Absorption correction</b>             | Multi-Scan                                                                                                                | Multi-Scan                                                                                                                |
| $T_{\max}, T_{\min}$                     | 0.990, 0.877                                                                                                              | 0.921, 0.687                                                                                                              |
| <b>Refinement method</b>                 | Full-matrix LSQ on $F^2$                                                                                                  | Full-matrix LSQ on $F^2$                                                                                                  |
| <b>Data / restraints / parameters</b>    | 6564 / 0 / 470                                                                                                            | 5786 / 76 / 481                                                                                                           |
| <b>Gof on <math>F^2</math></b>           | 1.093                                                                                                                     | 1.076                                                                                                                     |
| <b>Final R indices</b>                   | 5491 data; $I > 2\sigma(I)$<br>$R1 = 0.0376, wR2 = 0.0738$<br>all data<br>$R1 = 0.0505, wR2 = 0.0784$                     | 5062 data; $I > 2\sigma(I)$<br>$R1 = 0.0452, wR2 = 0.1107$<br>all data<br>$R1 = 0.0548, wR2 = 0.1149$                     |
| <b>Extinction coefficient</b>            | 0.0014(2)                                                                                                                 | -                                                                                                                         |
| $\Delta\rho_{\max}, \Delta\rho_{\min}$   | $0.317 \text{ e}\cdot\text{\AA}^{-3}, -0.200 \text{ e}\cdot\text{\AA}^{-3}$                                               | $0.652 \text{ e}\cdot\text{\AA}^{-3}, -0.469 \text{ e}\cdot\text{\AA}^{-3}$                                               |

\* Data reduction performed for two domains of multi-component crystal. Structure refinement based on merged reflections.

\*\* Data corresponding to  $2\theta$  range up to  $51.42^\circ$ .

a)

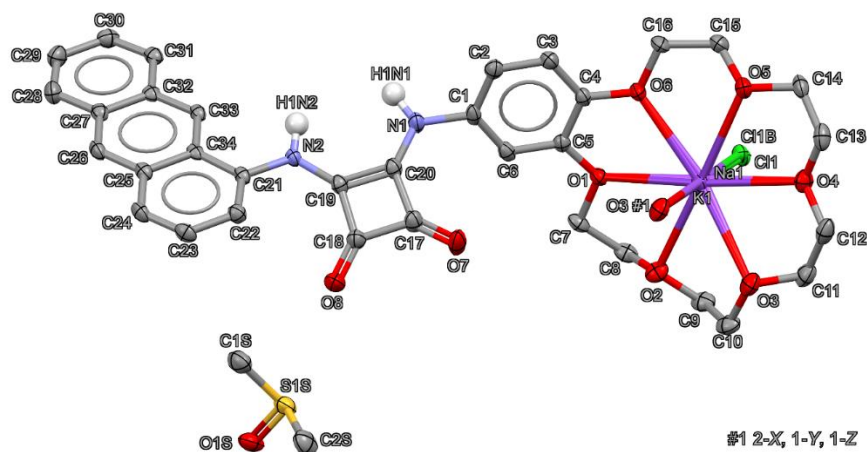

b)

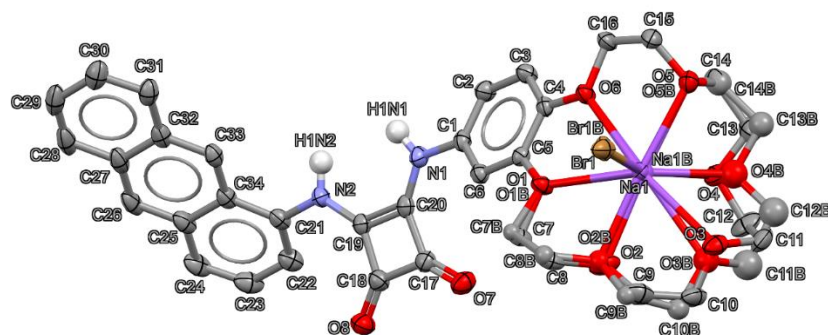

**Figure S90.** Thermal ellipsoids of atoms at 50% probability level for the structures of 1 + KCl/NaCl **a)** and 1 + NaBr **b)** together with a numbering scheme. All C-H hydrogen atoms were omitted for clarity. The data analysis for the obtained crystals was carried out with help of procedures described in references [S2-S9]. CCDC 2085348 and 2085349 contain the supplementary crystallographic data for this paper. These data can be obtained free of charge from The Cambridge Crystallographic Data Centre via [www.ccdc.cam.ac.uk/structures](http://www.ccdc.cam.ac.uk/structures).

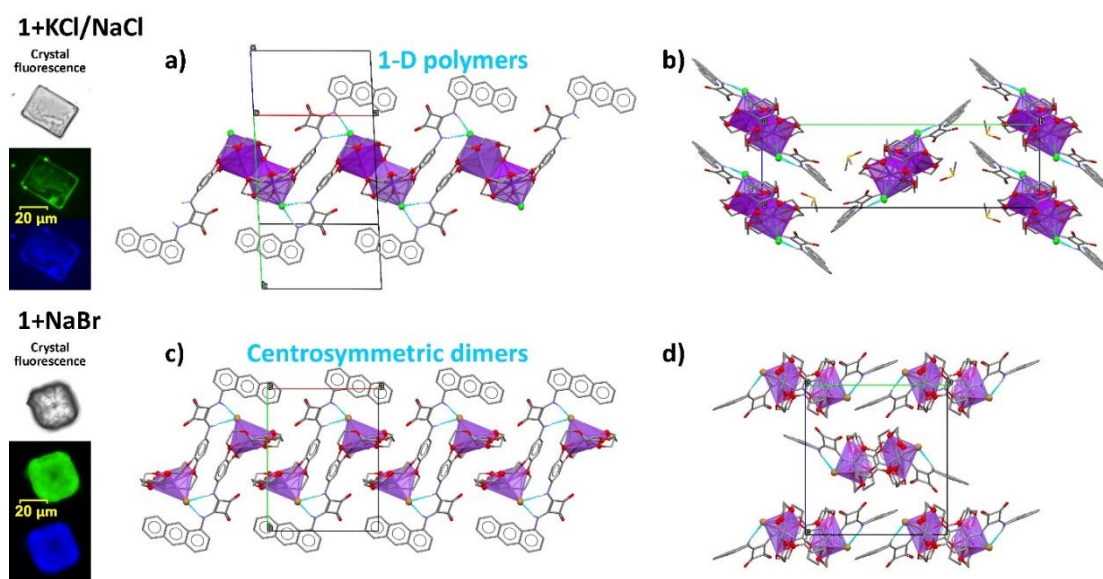

**Fig. S91.** Image presenting fluorescence of the crystals of **1** with KCl/NaCl and **1** with NaBr salts together with the molecular arrangements of moieties in the solid state: 1-D polymers in **1+KCl/NaCl** **a)**, **b)** and centrosymmetric dimers in **1+NaBr** **c)**, **d)**. All C-H hydrogen atoms were omitted for clarity.

## References

- [S1] Zaleskaya M, Jaglenieć D, Karbarz M, Dobrzycki Ł, Romański J, Squaramide based ion pair receptors possessing ferrocene as a signaling unit, *Inorg. Chem. Front.* **2020**;7:972–983.
- [S2] APEX3, *Bruker Nano Inc.* **2019**.
- [S3] SAINT, *Bruker Nano Inc.* **2019**.
- [S4] SADABS, *Bruker Nano Inc.* **2019**. TWINABS
- [S5] Sheldrick GM. SHELXT-Integrated Space-Group and Crystal-Structure Determination, *Acta Crystallogr.* **2015**;A71:3-8
- [S6] Sheldrick GM. Crystal Structure Refinement with SHELXL, *Acta Crystallogr.* **2015**; C71:3–8.
- [S7] Macrae CF, Bruno IJ, Chisholm JA, Edgington PR, McCabe P, Pidcock E, Rodriguez-Monge L, Taylor R, Streek J, Wood P. A. Mercury CSD 2.0 – New Features for the Visualization and Investigation of Crystal Structures, *J. Appl. Cryst.* **2008**;41:466-470.
- [S8] *International Tables for Crystallography*, Ed. Wilson, A. J. C. Kluwer: Dordrecht, **1992**, Vol.C.
- [S9] TWINABS, *Bruker Nano Inc.*, **2019**.
